# Supplementary material
Source: PubMed Central journal article supplement (PMC7556317)
Supplement: NIHMS1633907-supplement-Supporting_info.pdf [file NIHMS1633907-supplement-Supporting_info.pdf]

# Inhibition of HSP90 with pochoximes: SAR and structure-based insights

Sofia Barluenga, Jean-Gonzague Fontaine, Cuihua Wang, Kais Aouadi, Ruihong Chen, Kristin Beebez, Len Neckers, Nicolas Winssinger\*

## *Supporting information*

**General Techniques.** All reactions were carried out under a nitrogen atmosphere with dry (anhydrous) solvents under anhydrous conditions, unless otherwise noted. Anhydrous solvents were obtained by passing them through commercially available alumina column (Innovative Technology, Inc.,<sup>®</sup> VA). All substituted polystyrene resins (100-200 mesh, 1% DVB) were purchased from Novabiochem<sup>®</sup> or Aldrich<sup>®</sup>. The Grubbs' II catalyst was purchased from Materia Inc.<sup>®</sup> Solid phase reactions were carried on a Quest<sup>®</sup> 210 or round bottom flasks and filtered in fritted funnels. Reactions were monitored by thin layer chromatography (TLC) carried out on 0.25 mm E. Merck<sup>®</sup> silica gel plates (60F-254) using UV light as visualizing agent and 10% ethanolic phosphomolybdic acid or vanillin solution and heat as developing agents or by LC-MS. E. Merck<sup>®</sup> silica gel (60, particle size 0.040-0.063 mm) was used for flash column chromatography. PTLC (preparative thin layer chromatography) were carried out on 0.25 mm E. Merck<sup>®</sup> silica gel plates. NMR spectra were recorded on a Bruker Advance-400<sup>®</sup> instrument and calibrated by using residual undeuterated solvent as an internal reference. The following abbreviations were used to explain the multiplicities: s = singlet, d = doublet, t = triplet, q = quartet, m = multiplet, b = broad. LC-MS were recorded using an Agilent 1100<sup>®</sup> HPLC with a Bruker<sup>®</sup> micro-TOF instrument (ESI). Unless otherwise stated, a Supelco<sup>®</sup> C8 (5 cm x 4.6mm, 5  $\mu$ m particles) column was used with a linear elution gradient from 100% H<sub>2</sub>O (0.5% HCO<sub>2</sub>H) to 100% MeCN in 13 min at a flow rate of 0.5 ml/min. Unless otherwise stated, LDA was prepared at a concentration of 0.566 M by treating a solution of diisopropylamine (1.0 equiv.) in THF at -78 °C with *n*-butyllithium (1.0 equiv) and stirred for 30 min at this temperature before use.

**Esters A1 and A2:** Aromatic esters **A1** and **A2** were synthesized as previously reported.<sup>1</sup>

---

<sup>1</sup> S. Barluenga, C. Wang, J.G. Fontaine, K. Aouadi, K. Beebe, S. Tsutsumi, L. Neckers and N. Winssinger, *Angew. Chem., Int. Ed.* **47** (2008), p. 4432

**Weinreb amides B1:** Weinreb amide **B1** was synthesized as previously described.<sup>1</sup>

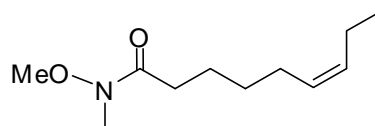

**B2**

**Weinreb Amide B2:** N,O-dimethylhydroxylamine hydrochloride (**15**) (976 mg, 10.0 mmol, 1 equiv), DMAP (122 mg, 1 mmol, 0.1 equiv) and EDC (1.92 g, 10.0 mmol, 1 equiv) were sequentially added to a solution of (Z)-6-nonenoic acid (1.56 g, 10.0 mmol, 1 equiv) in anhydrous CH<sub>2</sub>Cl<sub>2</sub> (30 mL). After stirring at room temperature for 4 hours, the reaction was diluted with EtOAc (30 mL), washed with saturated NH<sub>4</sub>Cl<sub>aq.</sub> (40 mL) and dried over Na<sub>2</sub>SO<sub>4</sub>. Concentration under reduced pressure and purification on silica chromatography (petroleum ether/EtOAc 12/1) afforded pure **B2** as a yellowish oil (1.69 g, 8.5 mmol) in an 85% yield. *R<sub>f</sub>* = 0.45 (petroleum ether/EtOAc 4/1); <sup>1</sup>H NMR (CDCl<sub>3</sub>, 400 MHz, 25 °C) δ = 5.40-5.26 (m, 2H), 3.67 (s, 3H), 3.17 (s, 3H), 2.41 (t, *J* = 7.4 Hz, 2H), 2.11-1.97 (m, 4H), 1.64 (tt, *J* = 8.7, 6.3 Hz, 2H), 1.39 (tt, *J* = 8.6, 6.7 Hz, 2H), 0.95 (t, *J* = 7.8 Hz, 3H); <sup>13</sup>C NMR (CDCl<sub>3</sub>, 100 MHz, 25 °C) δ = 131.9, 128.7, 61.2, 31.8 (×2), 29.5, 26.9, 24.3, 20.5, 14.3, one quaternary carbon is not visible.

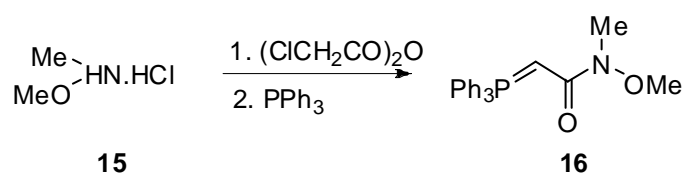

**Synthesis of N-Methoxy-N-methyl-2-(triphenylphosphoranylidene)acetamide (16).** To a solution of N,O-dimethylhydroxylamine hydrochloride (**15**) (48.8 g, 500 mmol, 1.0 equiv) in CH<sub>2</sub>Cl<sub>2</sub> (1.0 L) at 0 °C were added sequentially pyridine (80.6 mL, 1.0 mol, 2.0 equiv) and chloroacetic anhydride (85.5 g, 500 mmol, 1.0 equiv). The resulting mixture was stirred for 15 min at 0 °C, then warm up to 23 °C and stirred for 3 hours. The reaction mixture was then poured carefully into sat. NaHCO<sub>3aq</sub> solution (1.0 L) and stirred 1 hour, and then the layers were separated, the aqueous phase was extracted with CH<sub>2</sub>Cl<sub>2</sub> (400 mL) and the combined

organic layers were washed with 6N HCl (200 mL x 2), brine (200 mL x 2), dried over Na<sub>2</sub>SO<sub>4</sub> (10 g) and filtered. Evaporation of the solvents under reduced pressure afforded the corresponding acetamide (N-methoxy-N-methyl acetamide-2-chloride) as a green oil which was used in the next step without further purification. To a solution of this acetamide in CH<sub>3</sub>CN (800 mL) was added Ph<sub>3</sub>P (108.0 g, 411.7 mmol, 1 equiv from crude acetamide) and the resulting mixture was refluxed for 18 hours. Then the solvents were removed under vacuum and the resulting viscous oil was dissolved in CH<sub>2</sub>Cl<sub>2</sub> (1.0 L), washed with 2N KOH (400 mL x 2), brine (400 mL) and dried over Na<sub>2</sub>SO<sub>4</sub> (10.0 g). Filtration and evaporation of the solvents under reduced pressure afforded N-methoxy-N-methyl-2-(triphenylphosphoranylidene)acetamide (**16**) as a thick oil that solidified by standing (146.5 g, 403.3 mmol, 81% over two steps). This compound was used in the next step without further purification. *R*<sub>f</sub> = 0.85 (Hexane/EtOAc 3/1); <sup>1</sup>H NMR (CDCl<sub>3</sub>, 400 MHz, 25 °C) δ = 7.71-7.65 (m, 6H), 7.55-7.50 (m, 3H), 7.48-7.42 (m, 6H), 3.74 (s, 3H), 3.53 (d, *J*<sub>PH</sub> = 23.5 Hz, 1H) 3.08 (s, 3H); <sup>13</sup>C NMR (CDCl<sub>3</sub>, 100 MHz, 25 °C) δ = 133.3 (× 3), 133.2 (× 3), 131.9 (× 3), 128.9 (× 3), 128.8 (× 3), 127.9, 61.3, 35.9, four quaternary carbons are not visible.

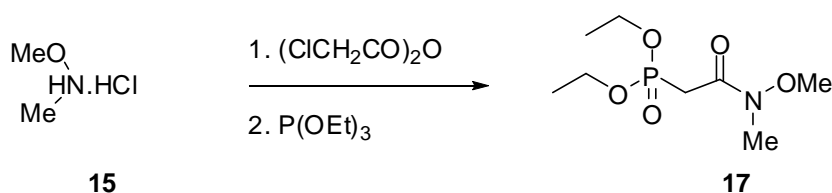

**Synthesis of (N-methoxy-N-methylcarbamoyl)methylphosphonate (17).** To a solution of N,O-dimethylhydroxylamine hydrochloride (**15**) (48.8 g, 500 mmol, 1.0 equiv) in CH<sub>2</sub>Cl<sub>2</sub> (1.0 L) at 0 °C were added pyridine (80.63 mL, 1.0 mol, 2.0 equiv) and chloroacetic anhydride (85.5 g, 500 mmol, 1.0 equiv). The resulting mixture was stirred for 15 min at 0 °C, then warm up to 23 °C and stirred overnight. The reaction mixture was then poured carefully into sat. NaHCO<sub>3</sub><sub>aq</sub> solution (1.0 L) and stirred 1 hour, after which the layers were separated, the aqueous phase was extracted with CH<sub>2</sub>Cl<sub>2</sub> (400 mL) and the combined organic layers were washed with 6N HCl (200 mL x 2), brine (200 mL x 2), dried over Na<sub>2</sub>SO<sub>4</sub> (10 g) and filtered. Evaporation of the solvents under reduced pressure afforded the corresponding acetamide (N-methoxy-N-methyl acetamide-2-chloride) as a green oil which was used in the next step without further purification. The N-methoxy-N-methyl acetamide-2-chloride was heated with triethylphosphite (70.5 mL, 411.3 mmol, 1.0 equiv from crude acetamide) neat at

100 °C for 20 hours. The mixture was then distilled (110 °C at 0.5 Torr), to afford pure phosphonate **17** as a colorless oil (83.7 g, 70 % over two steps).  $R_f = 0.63$  (petroleum ether/EtOAc 7/3);  $^1\text{H}$  NMR ( $\text{CDCl}_3$ , 400 MHz, 25 °C)  $\delta = 4.18\text{-}4.00$  (m, 4H), 3.70 (s, 3H), 3.13 (s, 3H), 3.08 (d,  $J_{\text{PH}} = 21.8$  Hz, 2H), 1.27 (2 x t,  $J = 6.8$  Hz, 6H);  $^{13}\text{C}$  NMR ( $\text{CDCl}_3$ , 100 MHz, 25 °C)  $\delta = 165.9, 62.4$  ( $\times 2$ ), 61.4, 40.7, 32.0, 16.2 ( $\times 2$ );  $^{31}\text{P}$  NMR ( $\text{CDCl}_3$ , 162 MHz, 25 °C)  $\delta = 21, 16$ .

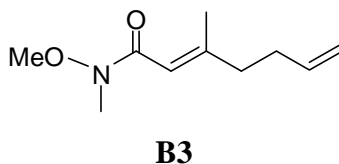

**Synthesis of Weinreb amide B3.** To a suspension of NaH (4.8 g, 200 mmol, 1.2 equiv) in anhydrous THF (200 mL) was added dropwise at 0 °C diethyl (*N*-methoxy-*N*-methylcarbamoyl)methylphosphonate (**17**) (48.0 g, 200 mmol, 1.2 equiv) and the reaction mixture was stirred at this temperature for 30 min. Then, a solution of 5-hexen-2-one (19.4 mL, 167 mmol, 1.0 equiv) was added at 0 °C via cannula. After stirring at room temperature overnight, the reaction was quenched with saturated  $\text{NH}_4\text{Cl}_{\text{aq}}$  and extracted with EtOAc. The combined organic layers were washed with brine and dried over  $\text{Na}_2\text{SO}_4$ . Concentration under reduced pressure and purification on silica chromatography (petroleum ether/EtOAc 8/1 to 4/1 gradient) afforded pure Weinreb amide **B3** as a single isomer, in a 43% yield (13.0 g, 71 mmol).  $R_f = 0.52$  (petroleum ether/EtOAc 3/1);  $^1\text{H}$  NMR ( $\text{CDCl}_3$ , 400 MHz, 25 °C)  $\delta = 6.11$  (s, 1H), 5.87-5.73 (m, 1H), 5.04 (dd,  $J = 17.0, 1.7$  Hz, 1H), 4.89 (dd,  $J = 10.1, 1.7$  Hz, 1H), 3.66 (s, 3H), 3.20 (s, 3H), 2.27-2.23 (m, 4H), 2.12 (s, 3H);  $^{13}\text{C}$  NMR ( $\text{CDCl}_3$ , 100 MHz, 25 °C)  $\delta = 167.9, 155.2, 137.5, 115.1, 114.2, 61.4, 40.3, 31.7, 18.7$ , one quaternary carbon is not visible.

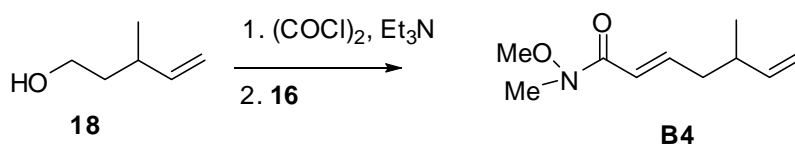

**Synthesis of Weinreb amide B4.** To the solution of  $(\text{COCl})_2$  (3.0 mL, 35.3 mmol, 1.5 equiv) in anhydrous  $\text{CH}_2\text{Cl}_2$  (150 mL) at -78 °C was added DMSO (5.0 mL, 70.6 mmol, 3

equiv) dropwise under nitrogen atmosphere and kept stirring for 30 min. Then 3-methylpent-4-en-1-ol (**18**) (2.35 g, 23.5 mmol, 1 equiv) was added by syringe and stirred for 30 min at the same temperature. Finally NEt<sub>3</sub> (9.8 mL, 70.5 mmol, 3 equiv) was added and the reaction was allowed to warm to 23 °C during one hour, subsequently N-methoxy-N-methyl-2-(triphenylphosphoranylidene)acetamide (**16**) (12.8 g, 35.3 mmol, 1.5 equiv) was added to the reaction mixture in one portion and stirred overnight. The solvent was removed by evaporation under reduced pressure and the residue obtained was purified by flash chromatography (silica gel, petroleum ether/EtOAc 6/1) to give Weinreb amide **B4** as pale yellow oil (1.84 g, 10 mmol) in a 43 % yield. R<sub>f</sub> = 0.5 (petroleum ether/EtOAc 3/1); <sup>1</sup>H NMR (CDCl<sub>3</sub>, 400 MHz, 25 °C) δ = 6.93 (dt, *J* = 15.5, 7.6 Hz, 1H), 6.39 (d, *J* = 15.5 Hz, 1H), 5.79-5.70 (m, 1H), 5.02-4.94 (m, 2H), 3.69 (s, 3H), 3.23 (s, 3H), 2.18-2.36 (m, 3H), 1.02 (d, *J* = 9.9 Hz, 3H), <sup>13</sup>C NMR (CDCl<sub>3</sub>, 100 MHz) δ = 166.8, 145.8, 143.2, 120.0, 113.2, 61.6, 39.5, 36.9, 32.3, 19.6.

### Synthesis of Weinreb amide **B5**.

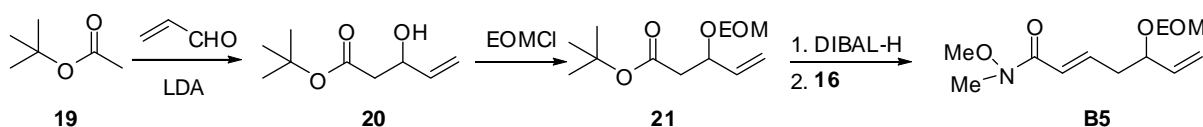

**Synthesis of alcohol 20.** To a solution of freshly prepared LDA (0.56 M, 60 mmol) at -78 °C was added a solution of *t*-butyl acetate (8.1 mL, 60 mmol, 1.0 equiv) in THF (10 mL) dropwise. After one hour at -78 °C, a solution of acrolein (4.0 mL, 60 mmol, 1.0 equiv) in THF (5 mL) was added and the reaction mixture was stirred at the same temperature for 5 more min. The reaction was then quenched with saturated NH<sub>4</sub>Cl<sub>aq</sub> solution (100 mL) and extracted with EtOAc (150 mL x 3), the combined organic phases were washed with brine (120 mL) and dried over anhydrous Na<sub>2</sub>SO<sub>4</sub> (10.0 g). Filtration and evaporation of the solvents under reduced pressure followed by flash chromatography (silica gel, 1/8 EtOAc/petroleum ether) afforded desired compound **20** in a 81% yield (8.35 g). R<sub>f</sub> = 0.25 (EtOAc/petroleum ether 1/8); <sup>1</sup>H (CDCl<sub>3</sub>, 400 MHz, 25 °C) δ = 5.96 (ddd, *J* = 15.9, 10.4, 5.2 Hz, 1H), 5.30 (dd, *J* = 15.9, 0.8 Hz, 1H), 5.14 (dd, *J* = 10.4, 0.8 Hz, 1H), 4.46-4.40 (m, 1H), 3.13 (d, *J* = 4.4 Hz, 1H), 2.46-2.34 (m, 2H), 1.46 (s, 9H). <sup>13</sup>C NMR (CDCl<sub>3</sub>, 400 MHz, 25 °C) δ = 171.5, 138.9, 114.9, 81.2, 68.9, 42.1, 28.0 (x3).

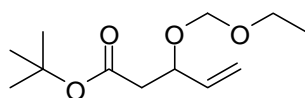

**21**

**Synthesis of alcohol 21:** To a solution of alcohol **20** (2.82 g, 16.4 mmol) in CH<sub>2</sub>Cl<sub>2</sub> (50 mL) at 0 °C under nitrogen atmosphere, was added diisopropylethylamine (5.7 mL, 32.7 mmol, 2.0 equiv) and EOMCl (3.65 mL, 39.3 mmol, 2.4 equiv), and the reaction was allowed to warm to 23 °C and stirred for 5 hours. Then the mixture was quenched with sat. NH<sub>4</sub>Cl<sub>aq</sub> solution and extracted with CH<sub>2</sub>Cl<sub>2</sub>, washed with brine and dried over anhydrous Na<sub>2</sub>SO<sub>4</sub>. Filtration and evaporation of the solvents under reduced pressure followed by flash chromatography (EtOAc/petroleum ether 1/10) afforded desired compound **21** (3.54 g, 15.4 mmol) in 94% yield. R<sub>f</sub> = 0.85 (petroleum ether/EtOAc 4/1); <sup>1</sup>H (CDCl<sub>3</sub>, 400 MHz, 25 °C) δ 5.73 (ddd, *J* = 17.3, 10.3, 7.8 Hz, 1H), 5.29 (d, *J* = 16.9 Hz, 1H), 5.21 (d, *J* = 10.3 Hz, 1H), 4.71 (d, *J* = 6.8 Hz, 1H<sub>A</sub>, AB system), 4.65 (d, *J* = 6.8 Hz, 1H<sub>B</sub>, AB system), 4.46 (td, *J* = 7.5, 6.1 Hz, 1H), 3.73-3.61 (m, 1H), 3.56-3.45 (m, 1H), 2.55 (dd, *J* = 15.0, 7.5 Hz, 1H<sub>A</sub>, A'B' system), 2.55 (dd, *J* = 15.0, 5.4 Hz, 1H<sub>B</sub>, A'B' system), 1.45 (s, 9H), 1.21 (t, *J* = 6.7 Hz, 3H); <sup>13</sup>C NMR (CDCl<sub>3</sub>, 400 MHz, 25 °C) δ 170.2, 137.3, 118.0, 92.9, 80.3, 74.4, 63.5, 42.4, 28.3, 15.2 (x 3).

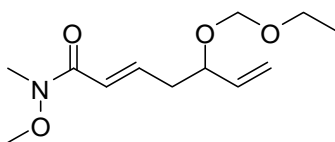

**B5**

**Weinreb amide B5:** To a solution of **21** (3.54 g, 15.4 mmol) in CH<sub>2</sub>Cl<sub>2</sub> (100 mL) under nitrogen atmosphere, DIBAL (18.4 mL, 1M in toluene, 1.2 equiv.) was added at -78 °C and the reaction was kept stirring for 30 min. Then a saturated solution of tartrate salt (100 mL) was added to the reaction and stirred for 2 hours until the system turned clear. The two phases were separated and extracted with CH<sub>2</sub>Cl<sub>2</sub> (100 mL x 2), washed with brine and dried over Na<sub>2</sub>SO<sub>4</sub>. After removal of the solvent, the residue (2.59 g) obtained was used directly in the next step without further purification. To a solution of the previously obtained aldehyde (2.59 g) in CH<sub>2</sub>Cl<sub>2</sub> (100 mL) N-methoxy-N-methyl-2-(triphenylphosphoranylidene)acetamide (**16**) (11.2 g, 30.8 mmol, 2.0 equiv.) was added at 23 °C and the reaction was

stirred overnight. After removal of the solvent under reduced pressure followed by flash chromatography (EtOAc/petroleum ether 1/10) desired compound **B5** (2.25 g) was isolated in a 60 % yield over two steps.  $R_f = 0.23$  (petroleum ether/EtOAc 4/1);  $^1\text{H}$  ( $\text{CDCl}_3$ , 400 MHz, 25 °C)  $\delta$  6.95 (dt,  $J = 15.2, 7.6$  Hz, 1H), 6.47 (d,  $J = 15.6$  Hz, 1H), 5.71 (ddd,  $J = 17.0, 9.8, 6.9$  Hz, 1H), 5.25 (d,  $J = 17.6$  Hz, 1H), 5.22 (d,  $J = 10.8$  Hz, 1H), 4.71 (d,  $J = 6.4$  Hz, 1H<sub>A</sub>, AB system), 4.63 (d,  $J = 7.1$  Hz, 1H<sub>B</sub>, AB system), 4.17 (td,  $J = 6.8, 6.8$  Hz, 1H), 3.74-3.65 (m, 1H), 3.70 (s, 3H), 3.56-3.47 (m, 1H), 3.24 (s, 3H), 2.60-2.42 (m, 2H), 1.20 (t,  $J = 7.0$  Hz, 3H),  $^{13}\text{C}$  ( $\text{CDCl}_3$ , 400 MHz, 25 °C)  $\delta$  166.6, 143.1, 137.5, 121.1, 117.8, 92.4, 76.0, 63.5, 61.7, 38.6, 32.4, 15.1.

### General procedure for the acylation reaction. Compounds **22**:

To a solution of the corresponding aromatic **A** (1.0 equiv) in anhydrous THF (6 mL/mmol) at  $-78^{\circ}\text{C}$  was added LDA (0.56 M, 2.0 equiv). Immediately, a precooled ( $-78^{\circ}\text{C}$ ) solution of the corresponding Weinreb amide **B** (0.9 equiv) in THF (1 mL/mmol) was added via a cannula. The reaction was stirred 20 minutes at  $-78^{\circ}\text{C}$  and then quenched with sat.  $\text{NH}_4\text{Cl}$  aq solution. Upon warming to room temperature, the resulting solution was extracted with EtOAc. The combined organic layers were washed with brine, dried over  $\text{Na}_2\text{SO}_4$  and concentrated under vacuum. Column chromatography (silica gel, hexane to hexane/EtOAc gradient) afforded the desired products **22** as pale yellow oils in 50 to 85% yield.

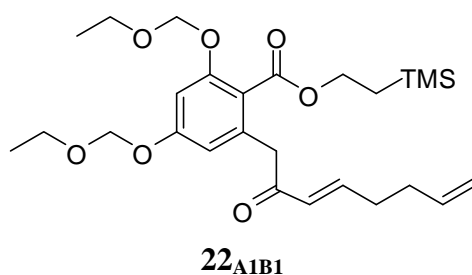

**22<sub>A1B1</sub>**:  $^1\text{H}$  NMR ( $\text{CDCl}_3$ , 400 MHz,  $25^{\circ}\text{C}$ )  $\delta$  = 6.86 (dt,  $J$  = 15.6, 6.4 Hz, 1H), 6.79 (d,  $J$  = 1.8 Hz, 1H), 6.50 (d,  $J$  = 1.8 Hz, 1H), 6.14 (dt,  $J$  = 15.8, 1.5 Hz, 1H), 5.74 (ddt,  $J$  = 17.0, 10.2, 6.3 Hz, 1H), 5.18 (s, 2H), 5.16 (s, 2H), 5.03-4.93 (m, 2H), 4.33-4.26 (m, 2H), 3.81 (s, 2H), 3.70 (q,  $J$  = 6.9 Hz, 2H), 3.67 (q,  $J$  = 6.9 Hz, 2H), 2.31-2.13 (m, 4H), 1.19 (t,  $J$  = 7 Hz, 3H), 1.17 (t,  $J$  = 7 Hz, 3H), 1.06-1.00 (m, 2H), 0.03 (s, 9H);  $^{13}\text{C}$  NMR (100 MHz,  $\text{CDCl}_3$ ,  $25^{\circ}\text{C}$ )  $\delta$  = 196.0, 167.5, 158.9, 156.2, 146.9, 136.8, 134.9, 129.3, 118.6, 115.4, 111.2, 102.7, 93.6, 92.9, 64.3, 64.2, 63.2, 45.5, 31.9, 31.6, 17.3, 14.9 ( $\times 2$ ), -1.7 ( $\times 3$ ).

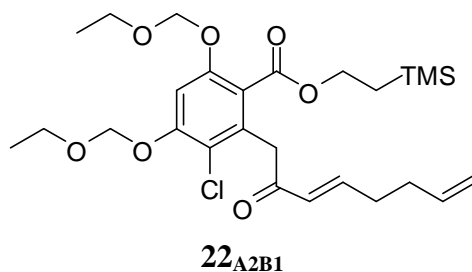

**22<sub>A2B1</sub>**:  $^1\text{H}$  NMR ( $\text{CDCl}_3$ , 400 MHz,  $25^{\circ}\text{C}$ )  $\delta$  = 7.11 (s, 1H), 6.92 (dt,  $J$  = 15.7, 6.6 Hz, 1H), 6.18 (dt,  $J$  = 15.6, 1.3 Hz, 1H), 5.79 (ddt,  $J$  = 16.8, 10.2, 6.4 Hz, 1H), 5.30 (s, 2H), 5.21 (s,



2H), 5.08-4.96 (m, 2H), 4.34-4.27 (m, 2H), 4.03 (s, 2H), 3.76 (q,  $J = 6.8$  Hz, 2H), 3.74 (q,  $J = 6.8$  Hz, 2H), 2.36-2.28 (m, 2H), 2.26-2.18 (m, 2H), 1.23 (t,  $J = 7.1$  Hz, 3H), 1.22 (t,  $J = 7.1$  Hz, 3H), 1.06-1.00 (m, 2H), 0.05 (s, 9H);  $^{13}\text{C}$  NMR (100 MHz,  $\text{CDCl}_3$ ,  $25^\circ\text{C}$ )  $\delta = 194.3$ , 166.9, 154.4, 153.7, 146.7, 136.8, 132.6, 129.1, 120.2, 117.5, 115.4, 102.9, 93.8, 93.7, 64.5, 64.3, 63.5, 43.0, 31.9, 31.5, 17.2, 14.6 ( $\times 2$ ), -1.7 ( $\times 3$ ).

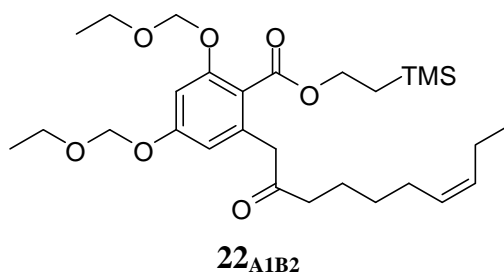

**22<sub>A1B2</sub>**:  $^1\text{H}$  NMR ( $\text{CDCl}_3$ , 400 MHz,  $25^\circ\text{C}$ )  $\delta = 6.81$  (d,  $J = 2.0$  Hz, 1H), 6.52 (d,  $J = 2.0$  Hz, 1H), 5.39-5.23 (m, 2H), 5.20 (s  $\times 2$ , 4H), 4.36-4.28 (m, 2H), 3.73 (q,  $J = 7.6$  Hz, 2H), 3.71 (q,  $J = 7.6$  Hz, 2H), 3.68 (s, 2H), 2.44 (t,  $J = 7.6$  Hz, 2H), 2.06-1.96 (m, 4H), 1.63-1.51 (m, 2H), 1.36-1.26 (m, 2H), 1.22 (t,  $J = 7.1$  Hz, 3H), 1.21 (t,  $J = 7.1$  Hz, 3H), 1.10-1.03 (m, 2H), 0.94 (t,  $J = 7.6$  Hz, 3H), 0.06 (s, 9H);  $^{13}\text{C}$  NMR (100 MHz,  $\text{CDCl}_3$ ,  $25^\circ\text{C}$ )  $\delta = 207.2$ , 167.7, 159.1, 156.4, 135.0, 131.9, 128.6 ( $\times 2$ ), 111.4, 102.9, 93.7, 93.0, 64.4 ( $\times 2$ ), 63.4, 48.1, 41.8, 29.2, 26.9, 23.2, 20.5, 17.4, 15.1, 15.0, 14.3, -1.5 ( $\times 3$ ).

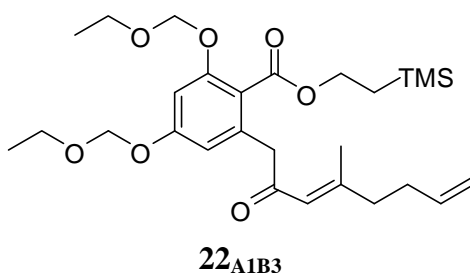

**22<sub>A1B3</sub>**:  $^1\text{H}$  NMR ( $\text{CDCl}_3$ , 400 MHz,  $25^\circ\text{C}$ )  $\delta = 6.76$  (d,  $J = 2.1$  Hz, 1H), 6.48 (d,  $J = 2.1$  Hz, 1H), 6.03 (s, 1H), 5.73-5.61 (m, 1H), 5.14 (s, 2H), 5.13 (s, 2H), 4.97-4.86 (m, 2H), 4.31-4.24 (m, 2H), 3.67 (q,  $J = 7.1$  Hz, 2H), 3.67 (s, 2H), 3.63 (q,  $J = 7.1$  Hz, 2H), 2.15-2.12 (m, 4H), 2.06 (d,  $J = 1.2$  Hz, 3H), 1.15 (t,  $J = 6.6$  Hz, 3H), 1.14 (t,  $J = 6.6$  Hz, 3H), 1.04-0.98 (m, 2H), 0.00 (s, 9H);  $^{13}\text{C}$  NMR (100 MHz,  $\text{CDCl}_3$ ,  $25^\circ\text{C}$ )  $\delta = 196.3$ , 167.4, 158.8, 158.4, 156.0,

136.9, 135.1, 122.3, 115.0, 111.2, 111.1, 102.5, 93.5, 92.8, 64.1, 64.0, 62.9, 49.0, 40.2, 31.3, 19.2, 17.1, 14.8 ( $\times 2$ ), -1.8 ( $\times 3$ ).

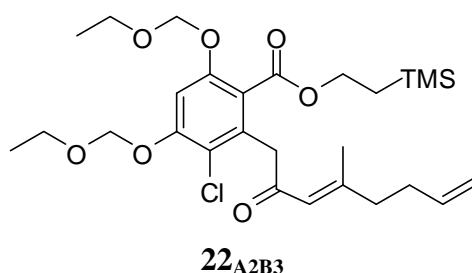

**22<sub>A2B3</sub>**: <sup>1</sup>H NMR (CDCl<sub>3</sub>, 400 MHz, 25 °C)  $\delta$  = 7.09 (s, 1H), 6.03 (s, 1H), 5.75-5.62 (m, 1H), 5.24 (s, 2H), 5.16 (s, 2H), 4.99-4.88 (m, 2H), 4.31-4.25 (m, 2H), 3.86 (s, 2H), 3.70 (q,  $J$  = 7.1 Hz, 2H), 3.67 (q,  $J$  = 7.1 Hz, 2H), 2.16 (s, 2H), 2.15 (s, 2H), 2.08 (d,  $J$  = 1.0 Hz, 3H), 1.17 (t,  $J$  = 7.2 Hz, 3H), 1.16 (t,  $J$  = 7.2 Hz, 3H), 1.02-0.96 (m, 2H), 0.00 (s, 9H); <sup>13</sup>C NMR (100 MHz, CDCl<sub>3</sub>, 25°C)  $\delta$  = 195.0, 167.0, 158.7, 154.5, 153.7, 137.1, 133.1, 122.2, 120.3, 117.6, 115.2, 102.9, 93.8 ( $\times 2$ ), 64.6, 64.3, 63.6, 46.5, 40.3, 31.5, 19.4, 17.3, 15.0 ( $\times 2$ ), -1.6 ( $\times 3$ ).

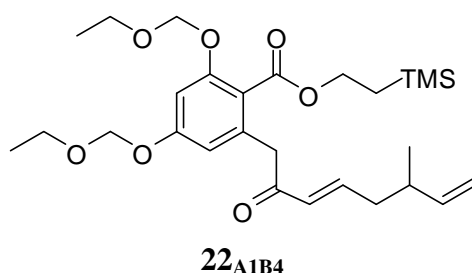

**22<sub>A1B4</sub>**: <sup>1</sup>H NMR (CDCl<sub>3</sub>, 400 MHz, 25 °C)  $\delta$  = 6.83 (dt,  $J$  = 15.6, 7.4 Hz, 1H), 6.80 (d,  $J$  = 2.1 Hz, 1H), 6.50 (d,  $J$  = 2.1 Hz, 1H), 6.13 (dt,  $J$  = 16.1, 2.1 Hz, 1H), 5.75-5.63 (m, 1H), 5.19 (s, 2H), 5.17 (s, 2H), 4.99-4.90 (m, 2H), 4.34-4.27 (m, 2H), 3.82 (s, 2H), 3.71 (q,  $J$  = 7.1 Hz, 2H), 3.69 (q,  $J$  = 7.0 Hz, 2H), 2.35-2.10 (m, 3H), 1.20 (t,  $J$  = 7.4 Hz, 3H), 1.19 (t,  $J$  = 7.4 Hz, 3H), 1.08-0.95 (m, 5H), 0.04 (s, 9H); <sup>13</sup>C NMR (100 MHz, CDCl<sub>3</sub>, 25°C)  $\delta$  = 196.1, 167.6, 159.0, 146.2, 142.8, 134.9, 130.4, 118.7, 113.4, 111.2, 102.7, 93.7, 92.9, 64.3 ( $\times 2$ ), 63.3, 45.5, 39.4, 36.8, 23.7, 19.6, 17.3, 15.0 ( $\times 2$ ), -1.6 ( $\times 3$ ).

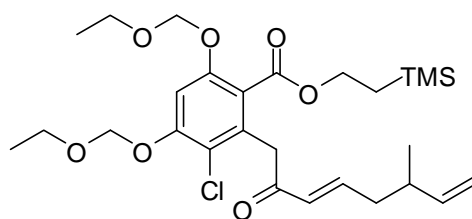

**22<sub>A2B4</sub>**

**22<sub>A2B4</sub>**: <sup>1</sup>H NMR (CDCl<sub>3</sub>, 400 MHz, 25 °C) δ = 7.10 (s, 1H), 6.86 (dt, *J* = 15.9, 7.5 Hz, 1H), 6.14 (dt, *J* = 15.7, 1.2 Hz, 1H), 5.71 (ddd, *J* = 17.1, 10.2, 6.8 Hz, 1H), 5.29 (s, 2H), 5.20 (s, 2H), 5.02-4.92 (m, 2H), 4.34-4.27 (m, 2H), 4.00 (s, 2H), 3.74 (q, *J* = 7.1 Hz, 2H), 3.71 (q, *J* = 7.0 Hz, 2H), 2.40-2.12 (m, 3H), 1.21 (t, *J* = 7.0 Hz, 3H), 1.20 (t, *J* = 7.0 Hz, 3H), 1.05-0.99 (m, 5H), -0.03 (s, 9H); <sup>13</sup>C NMR (100 MHz, CDCl<sub>3</sub>, 25°C) δ = 194.5, 167.0, 154.5, 153.8, 145.9, 142.8, 132.8, 130.2, 120.3, 117.6, 113.4, 103.0, 93.9, 93.8, 64.6, 64.4, 63.6, 43.0, 39.3, 36.8, 19.6, 17.3, 14.9 (× 2), -1.6 (× 3).

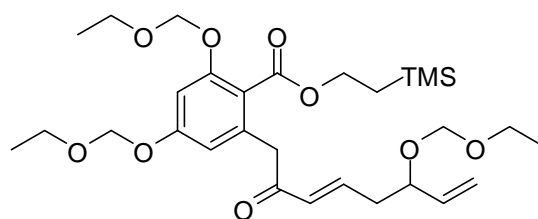

**22<sub>A1B5</sub>**

**22<sub>A1B5</sub>**: <sup>1</sup>H (CDCl<sub>3</sub>, 400 MHz, 25 °C) δ 6.79 (dt, *J* = 15.6, 7.3 Hz, 1H); 6.72 (d, *J* = 2.0 Hz, 1H); 6.42 (d, *J* = 2.2 Hz, 1H); 6.12 (dt, *J* = 15.7, 1.5 Hz, 1H); 5.57 (ddd, *J* = 17.0, 10.4, 7.7 Hz, 1H); 5.20-5.06 (m, 2H); 5.10 (s, 2H); 5.08 (s, 2H); 4.58 (d, *J* = 6.9 Hz, 1H<sub>A</sub>, AB system); 4.50 (d, *J* = 7.3 Hz, 1H<sub>B</sub>, AB system); 4.25-4.18 (m, 2H), 3.75 (s, 2H), 3.68-3.51 (m, 6H), 3.44-3.34 (m, 1H), 2.42-2.27 (m, 2H), 1.18-1.05 (m, 9H), 1.00-0.93 (m, 2H), -0.04 (3 × s, 9H); <sup>13</sup>C (CDCl<sub>3</sub>, 400 MHz, 25 °C) δ 195.7, 167.5, 159.0, 156.3, 143.3, 137.2, 134.9, 131.1, 117.7, 111.3, 102.7, 93.6, 92.9, 92.2, 75.7, 64.3, 64.2, 63.3, 63.2, 45.5, 38.8, 23.8, 20.8, 17.3, 15.0, 14.1, -1.6 (× 3).

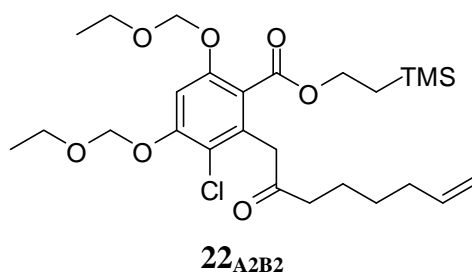

**Preparation of the saturated ketone 22<sub>A2B2</sub>:** To a solution of **22<sub>A2B1</sub>** (6.58 g, 12.48 mmol, 1 equiv) in CH<sub>2</sub>Cl<sub>2</sub>/AcOH mixture (10/1 125 mL/12.5 mL) at 0 °C was added NaBH<sub>3</sub>CN (1.57 g, 24.96 mmol, 2 equiv), and the reaction was warmed up to 23 °C and stirred for 3 hours. Then the reaction mixture was quenched with sat. NH<sub>4</sub>Cl<sub>aq</sub> solution, extracted with CH<sub>2</sub>Cl<sub>2</sub>, washed with brine, dried over Na<sub>2</sub>SO<sub>4</sub> and evaporated under reduced pressure. Column chromatography (silica gel, hexane to hexane/EtOAc gradient) afforded the desired product **22<sub>A2B2</sub>** (1.72 g, 3.26 mmol, 56%) as a colorless oil. <sup>1</sup>H NMR (CDCl<sub>3</sub>, 400 MHz, 25 °C) δ = 7.10 (s, 1H), 5.77 (ddt, *J* = 18.0, 10.4, 6.5 Hz, 1H), 5.30 (s, 2H), 5.20 (s, 2H), 5.02-4.88 (m, 2H), 4.36-4.29 (m, 2H), 3.85 (s, 2H), 3.76 (q, *J* = 7.1 Hz, 2H), 3.72 (q, *J* = 7.1 Hz, 2H), 2.45 (t, *J* = 7.3 Hz, 2H), 2.03 (qt, *J* = 7.2 Hz, 2H), 1.64-1.55 (m, 2H), 1.42-1.32 (m, 2H), 1.22 (t, *J* = 7.0 Hz, 3H), 1.21 (t, *J* = 7.0 Hz, 3H), 1.08-1.01 (m, 2H), 0.07 (s, 9H); <sup>13</sup>C NMR (100 MHz, CDCl<sub>3</sub>, 25 °C) δ = 205.6, 167.0, 154.6, 153.9, 138.5, 132.8, 120.4, 117.6, 114.5, 103.2, 94.0 (× 2), 64.7, 64.5, 63.8, 45.4, 41.6, 33.5, 28.3, 23.0, 17.4, 15.0 (× 2), -1.6 (× 3).

**General procedure for the oxime formation:** To a solution of the corresponding carbonyl compound (1.0 equiv) in pyridine (2.0 mL/mmol) at 40 °C was added carboxymethoxyamine hemihydrochloride (5.0 equiv) and the reaction was stirred at such temperature followed by TLC till complete consumption of the starting material. After evaporation of the pyridine, the residue was dissolved in CH<sub>2</sub>Cl<sub>2</sub> and washed with sat. NH<sub>4</sub>Cl (x 2), brine (x 2) and dried over anhydrous Na<sub>2</sub>SO<sub>4</sub>. Filtration and evaporation of the solvents under reduced pressure followed by filtration on a short pad of silica gel, afforded desired oximes as mixtures of E/Z isomers in 85 to 95% yield.

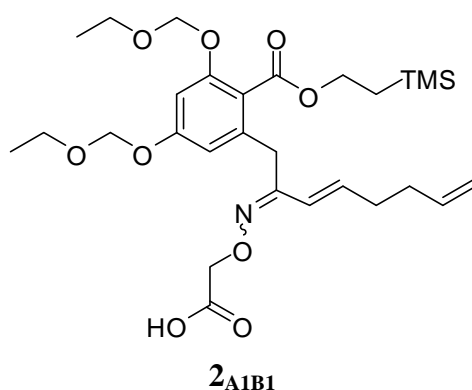

**2<sub>A1B2</sub>:** Mixture of two isomers (1:1) <sup>1</sup>H NMR (CDCl<sub>3</sub>, 400 MHz, 25 °C) δ = 8.65 (brs, 2H), 6.80-6.65 (m, 1H), 6.75 (d, *J* = 2.0 Hz, 1H), 6.72 (d, *J* = 2.0 Hz, 1H), 6.57 (d, *J* = 2.0 Hz, 1H), 6.49 (d, *J* = 2.0 Hz, 1H), 6.24 (dt, *J* = 16.3, 6.7, 1H), 6.15-6.02 (m, 2H), 5.72 (ddt, *J* = 17.1, 10.5, 6.6, 1H), 5.68 (ddt, *J* = 17.1, 10.5, 6.6, 1H), 5.19 (s, 4H), 5.17 (s, 2H), 5.16 (s, 2H), 4.98-4.86 (m, 4H), 4.67 (s, 2H), 4.66 (s, 2H), 4.42-4.35 (m, 4H), 3.87 (s, 2H), 3.71 (q, *J* = 7.2 Hz, 4H), 3.69 (q, *J* = 7.2 Hz, 4H), 3.65 (s, 2H), 2.25-2.05 (m, 8H), 1.21 (t, *J* = 7.1 Hz, 6H), 1.18 (t, *J* = 7.1 Hz, 6H), 1.12-1.06 (m, 4H), 0.07 (s, 9H), 0.06 (s, 9H); <sup>13</sup>C NMR (100 MHz, CDCl<sub>3</sub>, 25°C) δ = 173.7 (× 2), 168.3, 168.0, 159.1, 158.8, 158.1, 155.9, 155.6, 155.5, 142.0, 138.1, 137.4 (× 2), 137.3, 136.0, 125.8 (× 2), 118.7 (× 2), 118.5, 118.4, 115.1 (× 2), 109.0, 108.6, 102.3, 102.0, 93.6 (× 2), 93.0, 92.7, 70.4, 70.3, 64.5, 64.4 (× 2), 64.3, 63.6, 63.5, 34.3, 32.8, 32.6, 32.3, 28.4, 17.5, 15.0 (× 4), -1.54 (× 6).

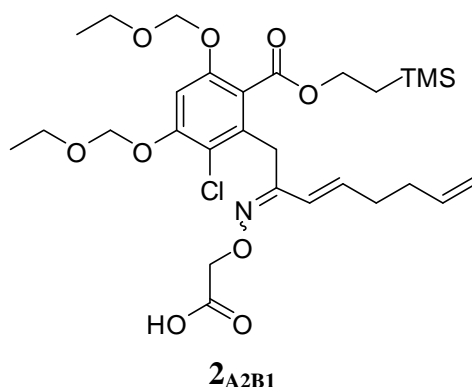

**2<sub>A2B1</sub>**: Mixture of two isomers (1:1) <sup>1</sup>H NMR (CDCl<sub>3</sub>, 400 MHz, 25 °C) δ = 9.35 (brs, 2H), 7.04 (s, 2H), 6.73 (d, *J* = 16.4 Hz, 1H), 6.32 (dt, *J* = 16.4, 6.6 Hz, 1H), 6.05 (dt, *J* = 16.4, 6.6 Hz, 1H), 5.77 (d, *J* = 15.8 Hz, 1H), 5.66 (ddt, *J* = 17.0, 10.5, 6.5 Hz, 2H), 5.29 (s, 4H), 5.19 (s, 4H), 5.05-4.84 (m, 4H), 4.65 (s, 2H), 4.49 (s, 2H), 4.36-4.25 (m, 4H), 4.00 (s, 2H), 3.87 (s, 2H), 3.75 (q, *J* = 7.1 Hz, 4H), 3.70 (q, *J* = 7.0 Hz, 4H), 2.34-1.98 (m, 8H), 1.21 (t, *J* = 7.1 Hz, 6H), 1.20 (t, *J* = 7.1 Hz, 6H), 1.07-0.98 (m, 4H), 0.05 (s, 9H), 0.04 (s, 9H); <sup>13</sup>C NMR (100 MHz, CDCl<sub>3</sub>, 25°C) δ = 173.0, 172.9, 167.5, 167.1, 156.8, 155.0, 154.4, 154.3, 153.4, 140.6, 137.4, 137.2 (× 2), 134.3, 133.6, 124.2 (× 2), 120.3, 120.0, 119.2, 117.4, 117.3, 115.4, 114.9, 102.9, 102.6, 93.9, 93.8 (× 2), 93.7, 70.6, 70.2, 64.7 (× 2), 64.5, 64.4, 64.2, 63.7, 32.7 (× 2), 32.6, 32.5, 32.1, 29.4, 17.3, 17.1, 14.9 (× 4), -1.6 (× 6).

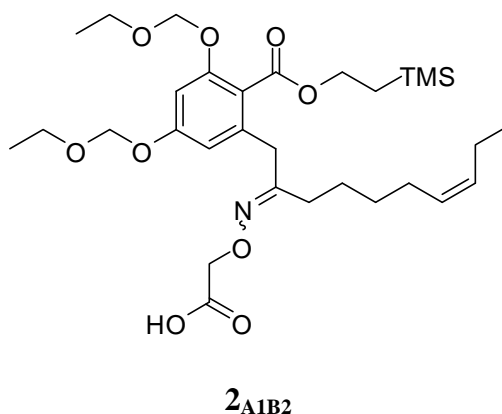

**2<sub>A1B2</sub>**: Mixture of two isomers (1:1) <sup>1</sup>H NMR (CDCl<sub>3</sub>, 400 MHz, 25 °C) δ = 9.39 (brs, 2H), 6.78 (d, *J* = 2.0 Hz, 1H), 6.76 (d, *J* = 2.1 Hz, 1H), 6.62 (d, *J* = 2.0 Hz, 1H), 6.59 (d, *J* = 2.1 Hz, 1H), 5.40-5.21 (m, 4H), 5.20 (s, 4H), 5.19 (s, 4H), 4.65 (s, 2H), 4.62 (s, 2H), 4.40-4.32 (m, 4H), 3.76-3.66 (m, 10H), 3.47 (s, 2H), 2.30 (t, *J* = 7.7 Hz, 2H), 2.11 (t, *J* = 7.7 Hz, 2H),

2.05-1.90 (m, 8H), 1.51-1.38 (m, 4H), 1.37-1.25 (m, 4H), 1.24-1.18 (m, 12H), 1.12-1.05 (m, 4H), 0.93 (t,  $J = 7.4$  Hz, 3H), 0.92 (t,  $J = 7.4$  Hz, 3H), 0.07 (s, 18H);  $^{13}\text{C}$  NMR (100 MHz,  $\text{CDCl}_3$ , 25°C)  $\delta = 173.6, 173.4, 168.0, 167.7, 162.1, 160.6, 159.1, 158.8, 155.9, 155.7, 148.0, 137.5, 136.2, 136.1, 131.8, 128.7 (\times 2), 124.3 (\times 2), 119.3, 118.9, 110.4, 109.7, 102.7, 102.5, 93.6, 93.1, 92.8, 70.2, 70.1, 64.4 (\times 2), 63.6, 63.5, 53.4, 37.3, 33.1, 31.8, 29.7, 29.2, 27.9, 26.7, 25.7, 25.4, 20.4 (\times 2), 17.5, 17.4, 15.0 (\times 4), 14.3 (\times 2), -1.6 (\times 6)$ .

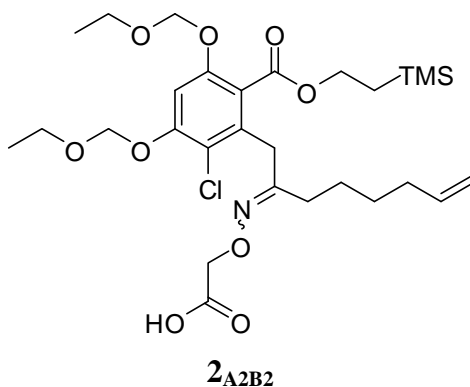

**2<sub>A2B2</sub>**: Mixture of two isomers (1:1)  $^1\text{H}$  NMR ( $\text{CDCl}_3$ , 400 MHz, 25 °C)  $\delta = 10.50$  (brs, 2H), 7.08 (s, 1H), 7.07 (s, 1H), 5.84-5.65 (m, 2H), 5.31 (s, 2H), 5.30 (s, 2H), 5.21 (s, 2H), 5.19 (s, 2H), 5.04-4.83 (m, 4H), 4.65 (s, 2H), 4.52 (s, 2H), 4.38-4.29 (m, 4H), 3.96 (s, 2H), 3.82-3.65 (m, 8H), 3.74 (s, 2H), 2.32 (t,  $J = 7.7$  Hz, 2H), 2.07-1.97 (m, 4H), 1.95 (t,  $J = 7.7$  Hz, 2H), 1.55-1.35 (m, 6H), 1.35-1.27 (m, 2H), 1.26-1.18 (m, 12H), 1.10-1.02 (m, 4H), 0.06 (s, 18H);  $^{13}\text{C}$  NMR (100 MHz,  $\text{CDCl}_3$ , 25°C)  $\delta = 172.9 (\times 2), 167.1, 166.9, 161.5, 159.6, 154.5, 154.4, 153.6, 153.5, 148.2, 138.7, 138.5, 137.4, 133.9, 133.1, 124.2 (\times 2), 120.8, 120.6, 117.7 (\times 2), 114.5, 114.3, 103.2, 103.0, 94.0, 93.9, 70.4, 70.1, 64.8, 64.7, 64.5 (\times 2), 64.1, 63.8, 53.4, 35.5, 33.3 (\times 2), 32.0, 30.9, 28.8, 28.3, 28.2, 25.2, 25.0, 17.3, 15.0 (\times 4), -1.6 (\times 6)$ .

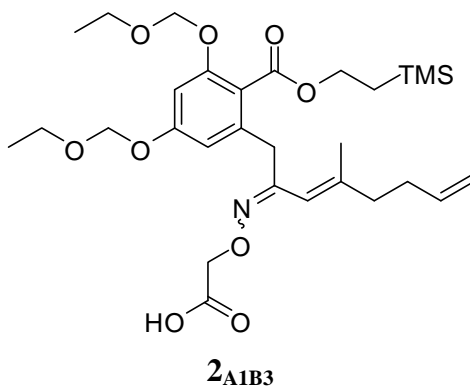

**2<sub>A1B3</sub>**: Mixture of two isomers (1:1) <sup>1</sup>H NMR (CDCl<sub>3</sub>, 400 MHz, 25 °C) δ = 9.15 (brs, 2H), 6.76 (d, *J* = 2.2 Hz, 1H), 6.74 (d, *J* = 2.2 Hz, 1H), 6.60 (d, *J* = 2.0 Hz, 1H), 6.58 (d, *J* = 2.0 Hz, 1H), 5.78-5.62 (m, 2H), 5.60 (s, 1H), 5.45 (s, 1H), 5.19 (s × 4, 8H), 5.01-4.85 (m, 4H), 4.69 (s, 2H), 4.62 (s, 2H), 4.39-4.31 (m, 4H), 3.78 (s, 2H), 3.76-3.65 (m, 8H), 3.60 (s, 2H), 2.39-1.58 (m, 14H), 2.24-2.16 (m, 12H), 1.11-1.05 (m, 4H), 0.06 (s, 18H); <sup>13</sup>C NMR (100 MHz, CDCl<sub>3</sub>, 25°C) δ = 173.9, 173.8, 168.1, 167.8, 159.1, 158.8, 157.4, 157.3, 155.9, 155.7, 146.3, 145.4, 137.8 (× 2), 136.6, 136.4, 118.8 (× 2), 116.1, 114.8 (× 3), 114.7 (× 2), 110.4, 109.9, 102.6, 102.4, 93.7, 93.0, 70.4, 70.3, 64.5 (× 4), 63.7, 63.5, 39.9, 39.1, 33.3 (× 2), 31.9, 31.8, 19.6, 19.1, 17.5 (× 2), 15.1 (× 4), -1.47 (× 6).

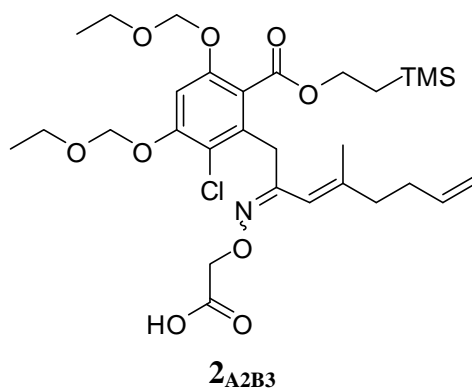

**2<sub>A2B3</sub>**: Mixture of two isomers (1:1) <sup>1</sup>H NMR (CDCl<sub>3</sub>, 400 MHz, 25 °C) δ = 9.94 (brs, 2H), 7.06 (s, 1H), 7.04 (s, 1H), 5.86-5.65 (m, 1H), 5.64-5.48 (m, 2H), 5.35-5.10 (m, 1H), 5.29 (s, 2H), 5.28 (s, 2H), 5.20 (s, 2H), 5.19 (s, 2H), 5.03-4.76 (m, 4H), 4.72 (s, 2H), 4.52 (s, 2H), 4.38-4.32 (m, 4H), 3.97 (s, 2H), 3.80 (s, 2H), 3.75 (q, *J* = 6.9 Hz, 2H), 3.73 (q, *J* = 6.9 Hz, 2H), 3.72 (q, *J* = 7.0 Hz, 2H), 3.71 (q, *J* = 7.0 Hz, 2H), 2.36-1.58 (m, 14H), 1.21 (t, *J* = 6.9 Hz, 6H), 1.20 (t, *J* = 6.9 Hz, 6H), 1.10-1.03 (m, 4H), 0.06 (s, 9H), 0.05 (s, 9H); <sup>13</sup>C NMR (100 MHz, CDCl<sub>3</sub>, 25°C) δ = 173.1 (× 2), 167.1 (× 2), 154.4 (× 2), 153.5 (× 2), 148.2 (× 2), 145.6, 145.5, 137.8, 134.1, 124.3, 124.2, 120.7 (× 2), 118.0 (× 2), 117.6 (× 2), 114.8, 114.5, 103.1, 102.9, 93.9, 93.8, 70.5, 70.3, 64.7 (× 2), 64.5 (× 2), 64.0, 63.8, 39.3, 38.7, 36.1 (× 2), 31.8 (× 2), 31.6, 31.5, 19.5, 18.7, 17.4, 17.3, 15.0 (× 4), -1.6 (× 6).



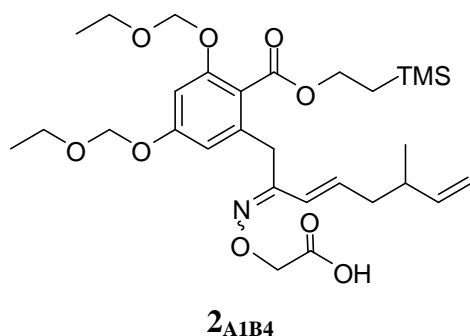

**2<sub>A1B4</sub>**: Mixture of four isomers (1:1) <sup>1</sup>H NMR (CDCl<sub>3</sub>, 400 MHz, 25 °C) δ = 9.47 (brs, 2H), 6.72 (d, *J* = 2.1 Hz, 1H), 6.70 (d, *J* = 2.1 Hz, 1H), 6.67 (dt, *J* = 16.4, 1.4 Hz, 1H), 6.55 (d, *J* = 2.1 Hz, 1H), 6.48 (d, *J* = 2.0 Hz, 1H), 6.21 (dt, *J* = 16.4, 7.0 Hz, 1H), 6.05-6.00 (m, 2H), 5.65-5.49 (m, 2H), 5.16 (s, 4H), 5.13 (s, 4H), 4.85-4.73 (m, 4H), 4.66 (s, 2H), 4.65 (s, 2H), 4.39-4.33 (m, 4H), 3.86 (s, 2H), 3.72-3.59 (m, 10H), 2.20-1.98 (m, 6H), 1.17 (t, *J* = 6.5 Hz, 6H), 1.15 (t, *J* = 6.5 Hz, 3H), 1.14 (t, *J* = 6.5 Hz, 3H), 1.10-1.04 (m, 4H), 0.87 (d, *J* = 6.5 Hz, 3H), 0.82 (d, *J* = 6.5 Hz, 3H), 0.04 (s, 9H), 0.03 (s, 9H); <sup>13</sup>C NMR (100 MHz, CDCl<sub>3</sub>, 25°C) δ = 174.0 (× 2), 168.0, 167.9, 158.9, 158.7, 157.7, 155.4, 155.3 (× 2), 146.8, 143.2, 143.0, 140.9, 137.5, 136.8, 136.0, 126.6, 124.5, 119.3, 118.3 (× 2), 112.8, 109.0, 108.8, 101.9, 101.7, 93.4 (× 2), 92.9, 92.7, 70.2 (× 2), 64.2 (× 3), 64.1, 63.4 (× 2), 40.2, 39.9, 37.2, 37.1, 34.2, 28.1, 19.2, 19.1, 17.4, 14.9 (× 4), -1.66 (× 6).

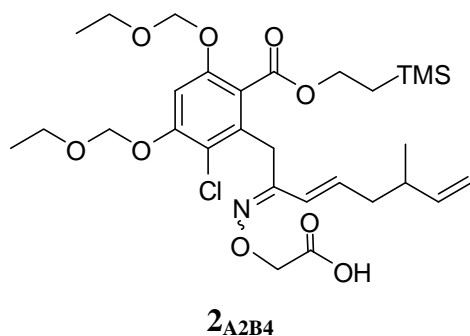

**2<sub>A2B4</sub>**: Mixture of four isomers (1:1) (CDCl<sub>3</sub>, 400 MHz, 25 °C) δ = 9.53 (brs, 2H), 7.04 (s, 2H), 6.69 (d, *J* = 16.1 Hz, 1H), 6.26 (dt, *J* = 16.1, 7.0 Hz, 1H), 5.97 (dt, *J* = 16.1, 7.0 Hz, 1H), 5.76 (d, *J* = 16.1 Hz, 1H), 5.71-5.53 (m, 2H), 5.28 (s, 4H), 5.18 (s, 2H), 5.17 (s, 2H), 4.96-4.84 (m, 4H), 4.65 (s, 2H), 4.49 (s, 2H), 4.33-4.27 (m, 4H), 4.02 (s, 2H), 3.87 (s, 2H), 3.77-3.67 (m, 8H), 2.26-1.98 (m, 6H), 1.20 (t, *J* = 7.1 Hz, 6H), 1.19 (t, *J* = 7.0 Hz, 6H), 1.06-0.99 (m, 4H), 0.96 (d, *J* = 6.4 Hz, 3H), 0.82 (d, *J* = 6.4 Hz, 3H), 0.05 (s, 9H), 0.03 (s, 9H); <sup>13</sup>C

NMR (100 MHz, CDCl<sub>3</sub>, 25°C)  $\delta$  = 173.5 ( $\times$  2), 167.4, 167.0, 156.7, 154.8, 154.4, 154.2, 153.4, 153.3, 143.2, 143.0, 139.4, 136.1, 134.4, 133.8, 128.9, 128.0, 125.2, 120.0, 117.4, 117.2, 113.1, 112.6, 102.8, 102.5, 93.8, 93.7 ( $\times$  2), 93.6, 70.5, 70.2, 64.6 ( $\times$  2), 64.4, 64.3, 64.1, 63.7, 40.2, 39.9, 37.2, 37.0, 32.7, 29.2, 19.4, 18.9, 17.2, 17.1, 14.8 ( $\times$  4), -1.69 ( $\times$  6).

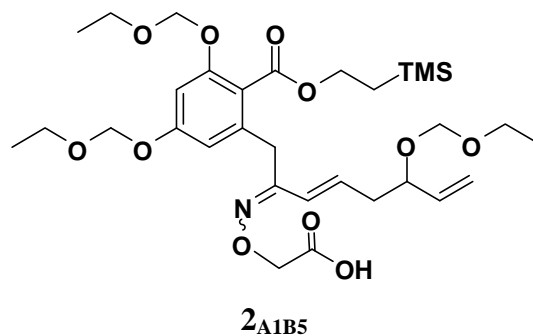

**2<sub>AIB5</sub>**: Mixture of four isomers (1:1) <sup>1</sup>H NMR (CDCl<sub>3</sub>, 400 MHz, 25 °C)  $\delta$  = 6.80 (dt,  $J$  = 16.2, 1.3 Hz, 1H); 6.76 (d,  $J$  = 2.0 Hz, 1H); 6.72 (d,  $J$  = 2.1 Hz, 1H); 6.58 (d,  $J$  = 2.2 Hz, 1H); 6.49 (d,  $J$  = 1.8 Hz, 1H); 6.26-6.04 (m, 3H); 5.60 (ddd,  $J$  = 17.2, 10.8, 7.6 Hz, 1H); 5.56 (ddd,  $J$  = 17.2, 10.8, 7.6 Hz, 1H); 5.19 (s  $\times$  2, 4H); 5.17 (s  $\times$  2, 4H); 5.14-5.01 (m, 4H); 4.72-4.50 (m, 8H); 4.41-4.34 (m, 4H); 4.04 (dt,  $J$  = 7.1, 7.1 Hz, 1H); 4.02 (dt,  $J$  = 7.1, 7.1 Hz, 1H); 3.89 (s, 2H); 3.77-3.64 (m, 10H); 3.62-3.53 (m, 2H); 3.51-3.41 (m, 2H); 2.49-2.28 (m, 4H); 1.22 (t  $\times$  2,  $J$  = 7.6 Hz, 12H); 1.18-1.13 (m, 6H); 1.13-1.06 (m, 4H); 0.07 (s  $\times$  2, 18H); <sup>13</sup>C NMR (100 MHz, CDCl<sub>3</sub>, 25°C)  $\delta$  = 170.8 ( $\times$  2), 167.5 ( $\times$  2), 159.0 ( $\times$  4), 156.3 ( $\times$  2), 143.3 ( $\times$  2), 137.2 ( $\times$  2), 134.9 ( $\times$  2), 131.1 ( $\times$  4), 118.6, 117.7, 111.3 ( $\times$  2), 102.7 ( $\times$  2), 93.6, 92.9 ( $\times$  2), 92.2, 75.7 ( $\times$  2), 64.3 ( $\times$  2), 64.2 ( $\times$  2), 63.3, 63.2, 60.2 ( $\times$  2), 45.5, 44.7, 38.4 ( $\times$  4), 23.8, 17.3, 15.0 ( $\times$  4), 14.1 ( $\times$  2), -1.6 ( $\times$  6), 2 quaternary signals are not visible.

**General procedure for the preparation of macrocyclic compounds.** To a suspension of 3.0 equiv of polystyrene based chlorotrityl resin (1.1 mmol/g) in CH<sub>2</sub>Cl<sub>2</sub> at room temperature were added 6.0 equiv of Hunig's base and 1.0 equiv of the corresponding acid **2**. After shaking the mixture for 24 hours, the different resins were capped with acetic acid for 24 hours more. Then the resins were washed with CH<sub>2</sub>Cl<sub>2</sub>, DMF, CH<sub>2</sub>Cl<sub>2</sub> and Et<sub>2</sub>O, dry and re-suspended in THF. To these suspensions, 4.0 equiv of TBAF (1M) were added and the mixtures were shaken for 4 hours. The resins were then filtered and washed thoroughly using THF, CH<sub>2</sub>Cl<sub>2</sub>, 1% AcOH in CH<sub>2</sub>Cl<sub>2</sub>, CH<sub>2</sub>Cl<sub>2</sub>, Et<sub>2</sub>O several times. The completion of the deprotection and total elimination of the tetrabutyl ammonium salts was assessed by LC-MS after cleavage of an analytical aliquot of each resin using a solution of HFIP in CH<sub>2</sub>Cl<sub>2</sub> 1/4 for 30 min. The resins were split for further diversification with the different alcohols or amine **C**. For alcohols, the Mitsunobu reactions were carried out in dry toluene at room temperature using 5.0 equiv of the corresponding alcohol **C**, 4.0 equiv of Ph<sub>3</sub>P and 4.0 equiv of DIAD for 12 h at room temperature. For the amine **C3**, the reaction was carried out in CH<sub>2</sub>Cl<sub>2</sub> using 2 equiv of the amine, DIC (5.0 equiv), 4-DMAP (5 mol%) at room temperature for 12 h. The conversions were assessed by LC-MS after cleavage of an analytical aliquot of resin as describe before and the resins which had not proceeded to completion were re-subjected to the same conditions. After washing and drying the resins were suspended in toluene and submitted to the metathesis reaction. Grubbs' second generation catalyst was added to each suspension (0.06 equiv) and the reactions were heated at 120 °C in a CEM microwave reactor for 3 x 45 min (fresh catalyst was added in each cycle). For the ene-yne metathesis of resins including fragment C8 5-bromopent-1-ene (0.06 equiv) was added in the solution to facilitate catalyst turnover. The resins were then washed with CH<sub>2</sub>Cl<sub>2</sub>, DMF, CH<sub>2</sub>Cl<sub>2</sub> and Et<sub>2</sub>O several times. Then the compounds were cleaved from the resin using a solution of HFIP in CH<sub>2</sub>Cl<sub>2</sub> 1/4 for 3 hours (re-subjection of the resin to the cleavage conditions afforded minimal quantities of compound suggesting the original cleavage had proceeded to completion) and the corresponding products were purified by PTLC and isolated with yields in between 20 to 30 % after 5 steps.

Each compound was dissolved in CH<sub>2</sub>Cl<sub>2</sub> and then aliquoted for further amidation. To each vial were added 2.0 equiv of the corresponding amine **D** (all amines used were commercially available), 3.0 equiv of PS-DCC (N-cyclohexylcarbodiimide, N'-methylpolystyrene HL, 200 - 400 mesh, 2% DVB, ≥ 1.30 mmol/g, Novabiochem, 01-64-0211) cat DMAP, and the suspensions were stirred for 72 h. The completion of each reaction was monitored by LC-MS. The corresponding amides were filtered, evaporated and re-

dissolved in methanol. To each solution were added 10 equiv of sulfonic acid polystyrene resin (sulfonic acid resin MP, 70-90 mesh, 3.0 mmol/g, Novabiochem, 01-64-0432) and the suspensions were stirred for 4 hours at room temperature. The final compounds were filtered, purified by PTLC and isolated in 75 to 85% yield.

**Selected examples of final macrocycles.** All compounds were obtained as E/Z mixtures 1:1 but for characterization purposes, when possible, the E-isomer was isolated and its data reported.

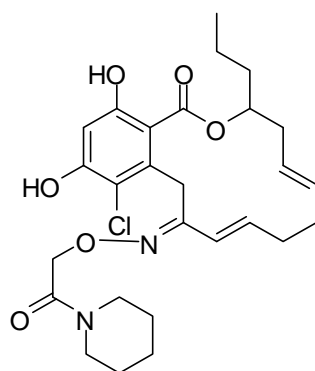

**1<sub>A2B1C2D1</sub>**

**1<sub>A2B1C2D1</sub>**: E isomer; <sup>1</sup>H NMR (CDCl<sub>3</sub>, 400 MHz, 25 °C) δ 11.46 (bs, 1H), 6.63 (s, 1H), 6.03 (m, 1H), 5.30-5.05 (m, 2H), 5.13 (d, *J* = 16.1 Hz, 1H), 4.84 (s, 1H), 4.82 (s, 1H), 4.27 (s, 1H), 4.15 (s, 1H), 3.65-3.40 (m, 4H), 3.34-3.21 (m, 1H), 2.65-1.92 (m, 6H), 1.35-1.20 (m, 6H), 0.97 (t, *J* = 7.3 Hz, 3H), 0.91 (q, *J* = 7.3 Hz, 2H), 0.90 (q, *J* = 7.3 Hz, 2H), one OH is not visible; HRMS (MALDI-TOF) *m/z* [M + Na]<sup>+</sup> calcd for C<sub>27</sub>H<sub>35</sub>ClN<sub>2</sub>O<sub>6</sub>Na: 541.2082; found: 541.2090.

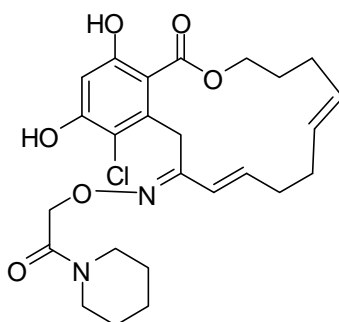

**1<sub>A2B1C5D1</sub>**

**1<sub>A2B1C5D1</sub>**: E isomer, <sup>1</sup>H NMR (CDCl<sub>3</sub>, 400 MHz, 25 °C) δ 11.31 (s, 1H), 6.41 (s, 1H), 6.22 (m, 1H), 5.50 (d, *J* = 15.8 Hz, 1H), 5.44-5.26 (m, 2H), 4.79 (s, 2H), 4.49 (t, *J* = 5.6 Hz, 2H), 4.21 (s, 2H), 3.62-3.37 (m, 4H), 2.33-1.93 (m, 8H), 1.34-1.21 (m, 4H), 0.93-0.79 (m, 2H), one OH signal is not visible; HRMS (MALDI-TOF) *m/z* [M + Na]<sup>+</sup> calcd for C<sub>25</sub>H<sub>31</sub>ClN<sub>2</sub>O<sub>6</sub>Na: 513.1769; found: 513.1753.

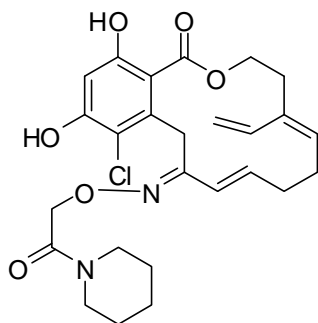

**1<sub>A2B1C8D1</sub>**

**1<sub>A2B1C8D1</sub>**: E isomer <sup>1</sup>H NMR (CDCl<sub>3</sub>, 400 MHz, 25 °C) δ 12.07 (s, 1H), 6.56 (s, 1H), 6.20-5.88 (m, 1H), 6.03 (d, *J* = 16 Hz, 1H), 5.60-5.46 (m, 1H), 4.92 (d, *J* = 23.1 Hz, 2H), 4.53-4.44 (m, 1H), 4.48 (s, 2H), 4.08 (s, 2H), 3.60-3.32 (m, 4H), 3.20 (m, 2H), 2.75 (t, *J* = 6.3 Hz, 2H), 2.50-2.39 (m, 2H), 2.28-2.15 (m, 2H), 1.37-1.23 (m, 4H), 0.93-0.78 (m, 2H), one OH signal is not visible; HRMS (MALDI-TOF) *m/z* [M + Na]<sup>+</sup> calcd for C<sub>26</sub>H<sub>31</sub>ClN<sub>2</sub>O<sub>6</sub>Na: 525.1769; found: 525.1747.

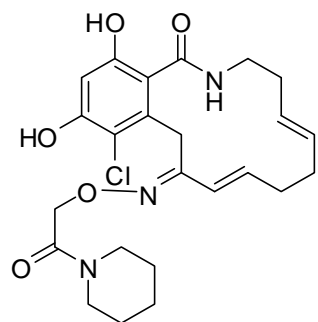

**1<sub>A2B1C3D1</sub>**

**1<sub>A2B1C3D1</sub>**: E isomer <sup>1</sup>H NMR (CDCl<sub>3</sub>, 400 MHz) δ 10.59 (s, 1H); 6.71 (d, *J* = 16.4 Hz, 1H); 6.64 (s, 1H); 6.24-6.13 (m, 1H); 5.41 (d, *J* = 15.3 Hz, 1H); 5.20-5.14 (m, 1H); 4.86 (s, 1H); 4.60 (s, 1H); 4.03 (s, 1H); 3.90 (s, 1H); 3.65-3.36 (m, 6H); 2.56-2.07 (m, 6H); 1.61-1.49 (m,

6H), 1 OH and 1 NH signals are not visible; HRMS (MALDI-TOF)  $m/z$   $[M + Na]^+$  calcd for  $C_{24}H_{30}ClN_3O_5Na$ : 498.1772; found: 498.1720.

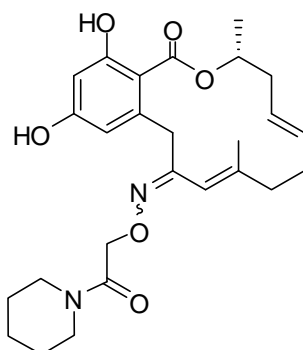

**1A1B3C1D1**

**1A1B3C1D1:** Mixture of isomers 1:1.  $^1H$  NMR ( $CDCl_3$ , 400 MHz)  $\delta$  11.92 (brs, 1H), 11.77 (brs, 1H), 6.56 (d,  $J = 2.4$  Hz, 1H), 6.53 (d,  $J = 2.4$  Hz, 1H), 6.36 (d,  $J = 2.4$  Hz, 1H), 6.35 (d,  $J = 2.8$  Hz, 1H), 5.43-5.17 (m, 6H), 5.11 (s, 1H), 5.02 (s, 1H), 4.88 (d,  $J = 14.4$  Hz, 1H), 4.81-4.74 (m, 2H), 4.70 (d,  $J = 14.4$  Hz, 1H), 4.46 (d,  $J = 13.6$  Hz, 1H), 4.16-4.09 (m, 2H), 3.96 (d,  $J = 15.6$  Hz, 1H), 3.64-3.37 (m, 8H), 2.78-2.60 (m, 4H), 2.23-2.12 (m, 8H), 1.79 (s, 3H), 1.65-1.56 (m, 12H), 1.53 (s, 3H), 1.35 (d,  $J = 6.4$  Hz, 3H), 1.29 (d,  $J = 6.4$  Hz, 3H), 2 OH signals are not visible; HRMS (MALDI-TOF)  $m/z$   $[M + Na]^+$  calcd for  $C_{26}H_{34}N_2O_6Na$ : 493.2315; found: 493.2375.

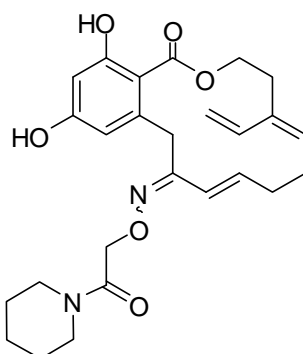

**1A1B1C8D1**

**1A1B1C8D1:** Mixture of isomers 1:1.  $^1H$  NMR ( $CDCl_3$ , 400 MHz)  $\delta$  10.95 (brs, 2H), 7.11 (d,  $J = 2.4$  Hz, 2H), 6.32 (d,  $J = 2.4$  Hz, 2H), 6.09-6.01 (m, 2H), 5.95 (d,  $J = 16.8$  Hz, 2H), 5.91 (d,  $J = 16.4$  Hz, 2H), 5.76-5.68 (m, 2H), 5.11 (s, 2H), 4.94 (s, 2H), 4.84 (s, 4H), 4.57 (t,  $J = 5.2$  Hz, 4H), 4.26 (s, 4H), 3.59-3.53 (m, 4H), 3.39-3.33 (m, 4H), 2.67 (t,  $J = 5.2$  Hz, 4H), 2.23-

2.17 (m, 8H), 1.60-1.52 (m, 8H), 1.36-1.28 (m, 4H), 2 OH signals are not visible; HRMS (MALDI-TOF)  $m/z$   $[M + Na]^+$  calcd for  $C_{26}H_{32}N_2O_6Na$ : 491.2158; found: 491.2162.

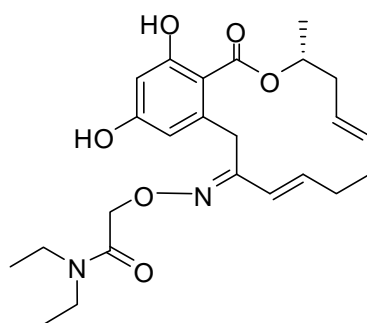

**1A1B1CID18**

**1A1B1CID18:** E isomer.  $^1H$  NMR ( $CDCl_3$ , 400 MHz)  $\delta$  11.21 (brs, 1H), 6.67 (d,  $J = 2.4$  Hz, 1H), 6.62 (d,  $J = 16.4$  Hz, 1H), 6.30 (d,  $J = 2.8$  Hz, 1H), 6.23-6.15 (m, 1H), 5.52-5.44 (m, 1H), 5.40-5.31 (m, 1H), 4.82 (d,  $J = 14.8$  Hz, 1H), 4.75 (d,  $J = 14.8$  Hz, 1H), 4.51 (d,  $J = 14.8$  Hz, 1H), 4.21 (t,  $J = 6.2$  Hz, 1H), 3.66 (d,  $J = 15.2$  Hz, 1H), 3.44-3.35 (m, 2H), 3.34-3.28 (m, 2H), 2.33-2.20 (m, 2H), 2.14-1.98 (m, 4H), 1.45 (d,  $J = 6.8$  Hz, 3H), 1.14 (t,  $J = 7.2$  Hz, 3H), 0.92 (t,  $J = 7.6$  Hz, 3H), 1 OH signals are not visible. HRMS (MALDI-TOF)  $m/z$   $[M + Na]^+$  calcd for  $C_{24}H_{32}NaN_2O_6$ : 467.2158; found: 467.2176

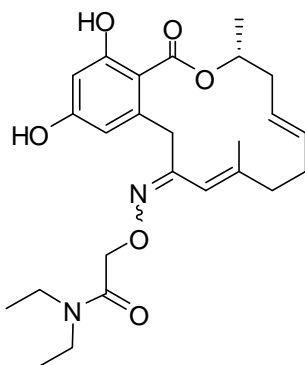

**1A1B3CID18**

**1A1B3CID18:** Mixture of isomers 1:1.  $^1H$  NMR ( $CDCl_3$ , 400 MHz)  $\delta$  11.92 (brs, 1H), 11.83 (brs, 1H), 6.98 (d,  $J = 2.4$  Hz, 2H), 6.34-6.33 (m, 2H), 5.38-5.15 (m, 6H), 4.93 (d,  $J = 14.4$  Hz, 2H), 4.79-4.68 (m, 2H), 4.75 (d,  $J = 14.4$  Hz, 2H), 4.27 (d,  $J = 14.4$  Hz, 2H), 4.04 (d,  $J = 14.4$  Hz, 2H), 3.44-3.26 (m, 8H), 2.24-2.19 (m, 4H), 1.74-1.72 (m, 8H), 1.36 (d,  $J = 6.8$  Hz, 6H), 1.34 (d,  $J = 6.8$  Hz, 6H), 1.27-1.21 (m, 6H), 1.14 (t,  $J = 7.4$  Hz, 6H), 2 OH signals are

not visible. HRMS (MALDI-TOF)  $m/z$   $[M + H]^+$  calcd for  $C_{25}H_{35}N_2O_6$ : 459.2495; found: 459.2499

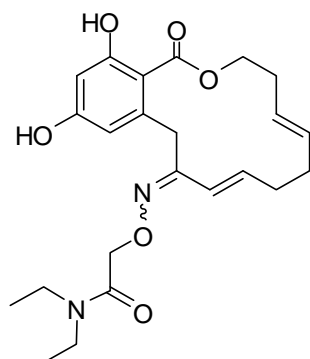

**1A1B1C4D18**

**1A1B1C4D18:** Mixture of isomers 1:1.  $^1H$  NMR ( $CDCl_3$ , 400 MHz)  $\delta$  11.70 (brs, 1H), 11.69 (brs, 1H), 6.99 (brs, 1H), 6.72 (d,  $J = 2.8$  Hz, 1H), 6.64 (d,  $J = 16.4$  Hz, 1H), 6.32 (d,  $J = 2.4$  Hz, 1H), 6.31 (d,  $J = 2.4$  Hz, 1H), 6.28-6.17 (m, 2H), 5.91 (d,  $J = 16$  Hz, 1H), 5.38-5.33 (m, 4H), 4.87 (s, 2H), 4.79 (s, 2H), 4.57-4.53 (m, 4H), 4.34 (s, 2H), 4.07 (s, 2H), 3.43-3.37 (m, 4H), 3.34-3.28 (q,  $J = 7.2$  Hz, 4H), 2.53-2.48 (m, 4H), 2.16-1.97 (m, 8H), 1.29-1.24 (m, 12H), 2 OH signals are not visible; HRMS (MALDI-TOF)  $m/z$   $[M + H]^+$  calcd for  $C_{23}H_{31}N_2O_6$ : 431.2182; found: 431.2186

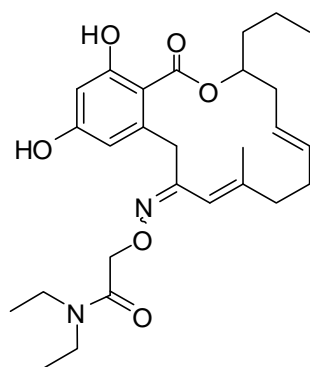

**1A1B3C2D18**

**1A1B3C2D18:** E isomer,  $^1H$  NMR ( $CDCl_3$ , 400 MHz)  $\delta$  11.82 (brs, 1H), 7.75 (brs, 1H), 7.02 (d,  $J = 2.4$  Hz, 1H), 6.34 (d,  $J = 2.4$  Hz, 1H), 5.35-5.28 (m, 1H), 5.20 (s, 1H), 5.14-5.10 (m, 1H), 4.94 (d,  $J = 14.4$  Hz, 1H), 4.74 (d,  $J = 14.4$  Hz, 1H), 4.31 (d,  $J = 14.4$  Hz, 1H), 4.07 (d,  $J = 14.4$  Hz, 1H), 3.44-3.28 (m, 4H), 2.70-2.63 (m, 1H), 2.25-2.18 (m, 2H), 2.14-2.07 (m, 2H),



1.73-1.72 (m, 6H), 1.25-1.21 (m, 6H), 1.14 (t,  $J = 7.2$  Hz, 3H), 0.95 (t,  $J = 7.2$  Hz, 3H).  
HRMS (MALDI-TOF)  $m/z$   $[M + Na]^+$  calcd for  $C_{27}H_{38}NaN_2O_6$ : 509.2627; found: 509.2652

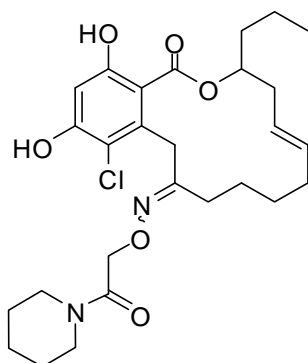

**1A2B2C2D1**

**1A2B2C2D1**: Mixture of isomers 1:1.  $^1H$  NMR ( $CDCl_3$ , 400 MHz)  $\delta$  11.79 (brs, 1H), 11.03 (brs, 1H), 6.61 (s, 1H), 6.08 (s, 1H), 5.42-5.28 (m, 6H), 4.79 (d,  $J = 13.2$  Hz, 2H), 4.74 (d,  $J = 13.6$  Hz, 2H), 4.39 (m, 2H), 4.27-4.23 (m, 3H), 3.61-3.54 (m, 4H), 3.51-3.45 (m, 4H), 2.53-2.47 (m, 2H), 2.33-2.20 (m, 4H), 2.06-1.91 (m, 8H), 1.70-1.58 (m, 12H), 1.44-1.29 (m, 13H), 0.95 (t,  $J = 7.2$  Hz, 6H), 2 OH signals are not visible; HRMS (MALDI-TOF)  $m/z$   $[M + Na]^+$  calcd for  $C_{27}H_{37}ClNaN_2O_6$ : 543.2237; found: 543.2263.

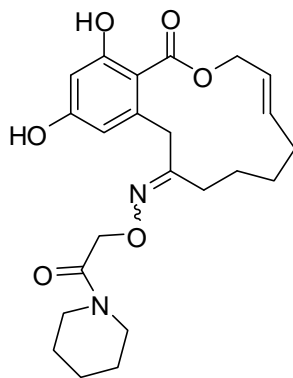

**1A1B2C6D1**

**1A2B2C2D1**: HRMS (MALDI-TOF)  $m/z$   $[M + Na]^+$  calcd for  $C_{23}H_{30}NaN_2O_6$ : 453.2001; found: 453.2010

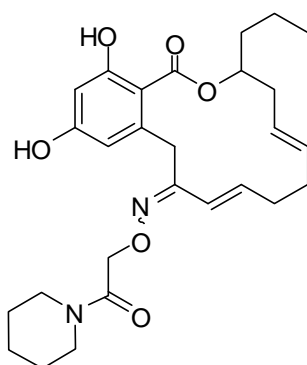

**1<sub>A1B1C2D1</sub>**

**1<sub>A1B1C2D1</sub>**: Mixture of isomers 1:1. <sup>1</sup>H NMR (CDCl<sub>3</sub>, 400 MHz) δ 6.99 (brs, 1H), 6.68 (d, *J* = 2.4 Hz, 1H), 6.61 (d, *J* = 16.8 Hz, 1H), 6.32 (d, *J* = 2.4 Hz, 1H), 6.30 (d, *J* = 2.4 Hz, 1H), 6.25-6.10 (m, 2H), 5.89 (d, *J* = 16.4 Hz, 1H), 5.50-5.31 (m, 4H), 4.94 (d, *J* = 14.4 Hz, 2H), 4.84-4.76 (m, 4H), 4.50 (d, *J* = 15.2 Hz, 1H), 4.44 (d, *J* = 14.4 Hz, 1H), 4.29 (d, *J* = 14.4 Hz, 1H), 4.21 (t, *J* = 6.0 Hz, 1H), 3.70-3.37 (m, 8H), 2.72-2.61 (m, 4H), 2.35-2.19 (m, 6H), 2.15-1.96 (m, 8H), 1.93-1.82 (m, 3H), 1.38-1.28 (m, 11H), 0.96 (t, *J* = 7.6 Hz, 3H), 0.92 (t, *J* = 7.6 Hz, 3H), 4 OH signals are not visible; HRMS (MALDI-TOF) *m/z* [M + H]<sup>+</sup> calcd for C<sub>27</sub>H<sub>37</sub>N<sub>2</sub>O<sub>6</sub>: 485.2651; found: 485.2611.

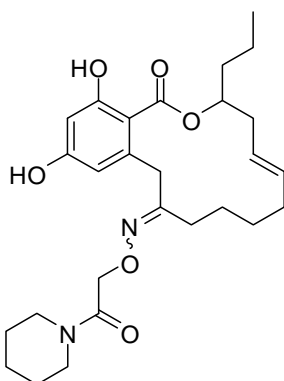

**1<sub>A1B2C2D1</sub>**

**1<sub>A1B2C2D1</sub>**: HRMS (MALDI-TOF) *m/z* [M + Na]<sup>+</sup> calcd for C<sub>27</sub>H<sub>38</sub>NaN<sub>2</sub>O<sub>6</sub>: 509.2628; found: 509.2639

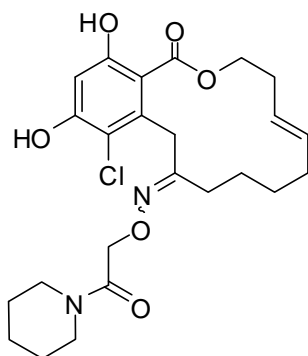

**1<sub>A2B2C4D1</sub>**

**1<sub>A2B2C4D1</sub>**: Mixture of isomers 1:1. <sup>1</sup>H NMR (CDCl<sub>3</sub>, 400 MHz) δ 6.61 (s, 1H), 6.05 (s, 1H), 5.41-5.26 (m, 6H), 4.80-4.75 (m, 3H), 4.58-4.47 (m, 4H), 4.30-4.17 (m, 3H), 4.21 (t, *J* = 5.6 Hz, 2H), 4.05-4.01 (m, 2H), 3.61-3.54 (m, 4H), 3.49-3.42 (m, 4H), 2.46-2.40 (m, 2H), 2.24-2.20 (m, 3H), 2.07-1.90 (m, 8H), 1.34-1.28 (m, 15H), 4 OH signals are not visible; HRMS (MALDI-TOF) *m/z* [M + Na]<sup>+</sup> calcd for C<sub>27</sub>H<sub>31</sub>NaN<sub>2</sub>O<sub>6</sub>: 501.1768; found: 501.1718

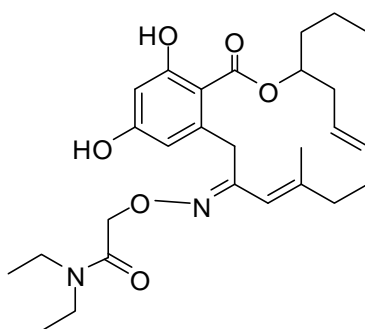

**1<sub>A1B3C2D18</sub>**

**1<sub>A1B3C2D18</sub>**: E isomer <sup>1</sup>H NMR (CDCl<sub>3</sub>, 400 MHz) δ 11.85 (brs, 1H), 7.12 (d, *J* = 2.4 Hz, 1H), 6.34 (d, *J* = 2.4 Hz, 1H), 5.38-5.31 (m, 2H), 5.25 (s, 1H), 5.23-5.11 (m, 2H), 4.96 (d, *J* = 14.4 Hz, 1H), 4.74 (d, *J* = 14.4 Hz, 1H), 4.34 (d, *J* = 14 Hz, 1H), 4.21 (t, *J* = 6 Hz, 1H), 4.10 (d, *J* = 14 Hz, 1H), 3.43-3.27 (m, 4H), 1.70 (s, 3H), 1.61-1.59 (m, 4H), 1.37-1.29 (m, 7H), 1.13 (t, *J* = 7.2 Hz, 3H), 0.95 (t, *J* = 7.2 Hz, 3H), 1 OH signal is not visible; HRMS (MALDI-TOF) *m/z* [M + Na]<sup>+</sup> calcd for C<sub>27</sub>H<sub>38</sub>NaN<sub>2</sub>O<sub>6</sub>: 509.2627; found: 509.2680.

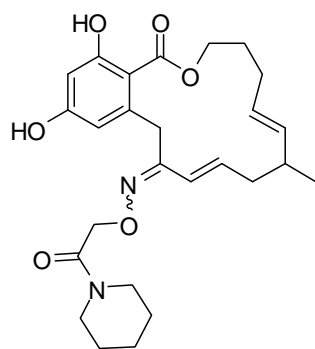

**1A1B4C5D1**

**1A1B4C5D1:** HRMS (MALDI-TOF)  $m/z$   $[M + Na]^+$  calcd for  $C_{26}H_{34}NaN_2O_6$ : 493.2314; found: 493.2331.

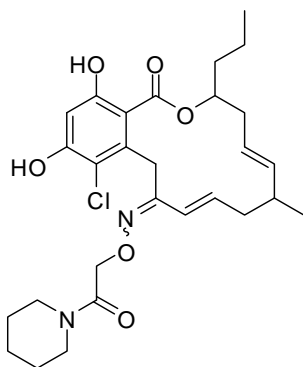

**1A2B4C2D1**

**1A2B4C2D1:** HRMS (MALDI-TOF)  $m/z$   $[M + Na]^+$  calcd for  $C_{28}H_{37}ClNaN_2O_6$ : 555.2238; found: 555.2242.

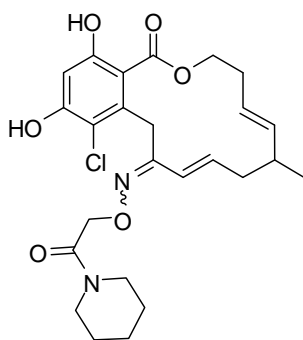

**1A2B4C4D1**

**1<sub>A2B4C4D1</sub>**: HRMS (MALDI-TOF)  $m/z$   $[M + Na]^+$  calcd for  $C_{25}H_{31}ClNaN_2O_6$ : 513.1768;  
found: 513.1780.

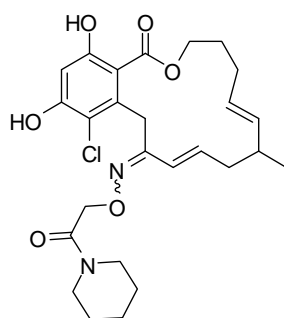

**1<sub>A2B4C5D1</sub>**

**1<sub>A2B4C5D1</sub>**: HRMS (MALDI-TOF)  $m/z$   $[M + Na]^+$  calcd for  $C_{26}H_{33}ClNaN_2O_6$ : 527.1925;  
found: 527.1939.

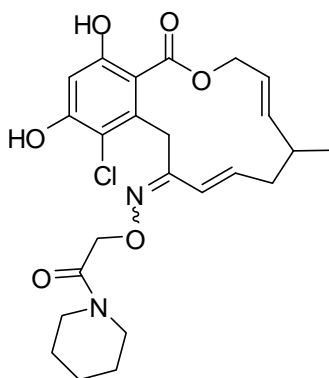

**1<sub>A2B4C6D1</sub>**

**1<sub>A2B4C6D1</sub>**: HRMS (MALDI-TOF)  $m/z$   $[M + Na]^+$  calcd for  $C_{24}H_{29}ClNaN_2O_6$ : 499.1612;  
found: 499.1626.

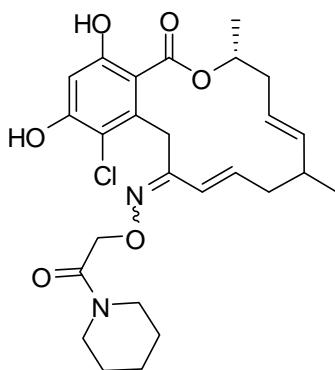

**1<sub>A2B4C1D1</sub>**

**1<sub>A2B4C1D1</sub>**: HRMS (MALDI-TOF)  $m/z$   $[M + Na]^+$  calcd for  $C_{26}H_{33}ClNaN_2O_6$ : 527.1925; found: 527.1932.

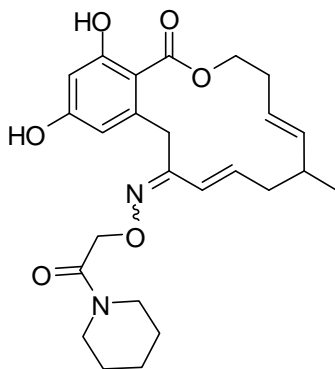**1<sub>A1B4C4D1</sub>**

**1<sub>A1B4C4D1</sub>**: HRMS (MALDI-TOF)  $m/z$   $[M + Na]^+$  calcd for  $C_{25}H_{32}NaN_2O_6$ : 479.2158; found: 479.2174.

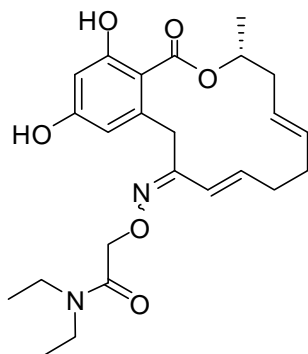**1<sub>A1B1C1D18</sub>**

**1<sub>A1B1C1D18</sub>**: E isomer,  $^1H$  NMR ( $CDCl_3$ , 400 MHz)  $\delta$  7.40 (d,  $J = 2.4$  Hz, 1H), 6.31 (d,  $J = 2.4$  Hz, 1H), 6.19-6.11 (m, 1H), 5.89 (d,  $J = 16$  Hz, 1H), 5.53-5.46 (m, 1H), 5.41-5.32 (m, 1H), 4.93 (d,  $J = 14.8$  Hz, 1H), 4.81 (d,  $J = 14.8$  Hz, 1H), 4.44 (d,  $J = 14.8$  Hz, 1H), 4.28 (d,  $J = 14.8$  Hz, 1H), 4.21 (t,  $J = 5.6$  Hz, 1H), 3.44-3.29 (m, 2H), 2.35-2.20 (m, 2H), 2.13-2.01 (m, 2H), 1.45 (d,  $J = 6.8$  Hz, 3H), 1.37-1.28 (m, 4H), 1.14 (t,  $J = 7.2$  Hz, 3H), 0.92 (t,  $J = 7.6$  Hz, 3H), 2 OH signals are not visible; HRMS (MALDI-TOF)  $m/z$   $[M + Na]^+$  calcd for  $C_{24}H_{32}NaN_2O_6$ : 467.2158; found: 467.2147.

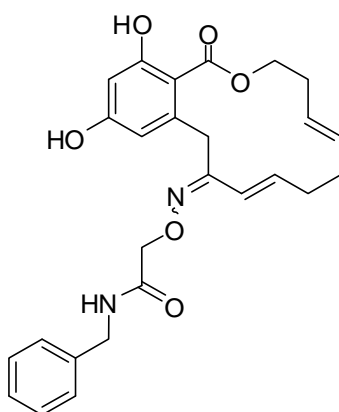

**1<sub>A1B1C4D22</sub>**

**1<sub>A1B1C4D22</sub>**: Mixture of isomers 1:1. <sup>1</sup>H NMR (CDCl<sub>3</sub>, 400 MHz) δ 11.60 (brs, 1H), 11.42 (brs, 1H), 7.35-7.28 (m, 11H), 6.69-6.62 (m, 2H), 6.49 (d, *J* = 16 Hz, 1H), 6.36 (d, *J* = 2.4 Hz, 1H), 6.33 (d, *J* = 2.4 Hz, 1H), 6.32 (d, *J* = 2.4 Hz, 1H), 6.28-6.24 (m, 1H), 6.23 (d, *J* = 2.8 Hz, 1H), 6.10 (dt, *J* = 16, 7.2 Hz, 1H), 5.73 (d, *J* = 16 Hz, 1H), 5.36-5.31 (m, 2H), 5.27-5.18 (m, 2H), 4.70 (s, 2H), 4.65 (s, 2H), 4.55-4.51 (m, 5H), 4.45 (t, *J* = 5.3 Hz, 2H), 4.27 (s, 2H), 4.08 (s, 2H), 2.50-2.42 (m, 4H), 2.17-2.07 (m, 8H), 1 NH signal is not visible; HRMS (MALDI-TOF) *m/z* [M + H]<sup>+</sup> calcd for C<sub>26</sub>H<sub>29</sub>N<sub>2</sub>O<sub>6</sub>: 465.2025; found: 465.1981.

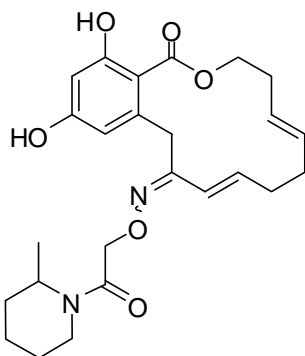

**1<sub>A1B1C4D2</sub>**

**1<sub>A1B1C4D2</sub>**: Mixture of isomers 1:1. <sup>1</sup>H NMR (CDCl<sub>3</sub>, 400 MHz) δ 11.67 (brs, 1H), 11.65 (brs, 1H), 8.00 (brs, 1H), 7.77 (brs, 1H), 7.13 (brs, 1H), 6.63-6.59 (m, 2H), 6.32 (2d, *J* = 2.8 Hz, 2H), 6.27-6.12 (m, 2H), 5.86 (d, *J* = 16.4 Hz, 1H), 5.37-5.33 (m, 4H), 4.95-4.72 (m, 4H), 4.57-4.51 (m, 4H), 4.34 (s, 2H), 4.10 (d, *J* = 15.2 Hz, 1H), 4.03 (d, *J* = 15.2 Hz, 1H), 3.58-3.48 (m, 2H), 3.20-3.09 (m, 2H), 2.77-2.69 (m, 2H), 2.53-2.45 (m, 4H), 2.17-2.05 (m, 8H),

1.71-1.32 (m, 12H), 1.30-1.12 (m, 6H). HRMS (MALDI-TOF)  $m/z$   $[M + H]^+$  calcd for  $C_{25}H_{33}N_2O_6$ : 457.2338; found: 457.2332.

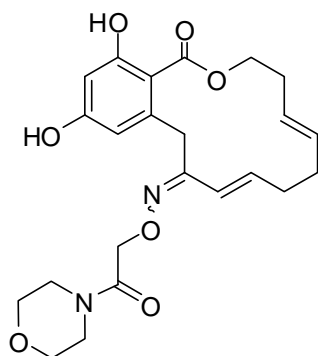

**1A1B1C4D10**

**1A1B1C4D10:** Mixture of isomers 1:1.  $^1H$  NMR ( $CDCl_3$ , 400 MHz)  $\delta$  11.66 (brs, 1H), 11.64 (brs, 1H), 7.56 (brs, 1H), 7.36 (brs, 1H), 6.95 (d,  $J = 2.8$  Hz, 1H), 6.59-6.54 (m, 2H), 6.33 (d,  $J = 2.8$  Hz, 1H), 6.32 (d,  $J = 2.8$  Hz, 1H), 6.28-6.13 (m, 2H), 5.84 (d,  $J = 16.1$  Hz, 1H), 5.38-5.32 (m, 4H), 4.85 (s, 2H), 4.78 (s, 2H), 4.54 (t,  $J = 5.2$  Hz, 4H), 4.33 (s, 2H), 4.07 (s, 2H), 3.71-3.64 (m, 12H), 3.52-3.48 (m, 4H), 2.50 (brt,  $J = 4.8$  Hz, 4H), 2.17-2.07 (m, 8H). HRMS (MALDI-TOF)  $m/z$   $[M + Na]^+$  calcd for  $C_{23}H_{28}NaN_2O_7$ : 467.1794; found: 467.1765.

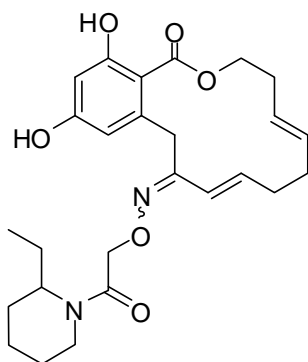

**1A1B1C4D5**

**1A1B1C4D5:** Mixture of isomers 1:1.  $^1H$  NMR ( $CDCl_3$ , 400 MHz)  $\delta$  11.62 (brs, 2H), 6.96 (d,  $J = 2$  Hz, 1H), 6.60 (d,  $J = 2.8$  Hz, 1H), 6.58 (d,  $J = 2.8$  Hz, 1H), 6.32 (brd,  $J = 2.4$  Hz, 2H), 6.24-6.10 (m, 2H), 5.81 (d,  $J = 16$  Hz, 1H), 5.35-5.32 (m, 5H), 4.92-4.72 (m, 4H), 4.56-4.45 (m, 4H), 4.31 (brs, 2H), 4.04 (brs, 2H), 3.75-3.67 (m, 1H), 3.59-3.51 (m, 1H), 3.12-3.03 (m, 1H), 2.64 (t,  $J = 12.8$  Hz, 1H), 2.52-2.46 (m, 4H), 2.14-2.04 (m, 8H), 1.70-1.58 (m, 10H), 1.60-1.34 (m, 5H), 1.19-1.13 (m, 1H), 1.07-1.01 (m, 1H), 0.98-0.82 (m, 6H), 2 OH signals are not



visible; HRMS (MALDI-TOF)  $m/z$   $[M + Na]^+$  calcd for  $C_{26}H_{34}NaN_2O_6$ : 493.2314; found: 493.2332.

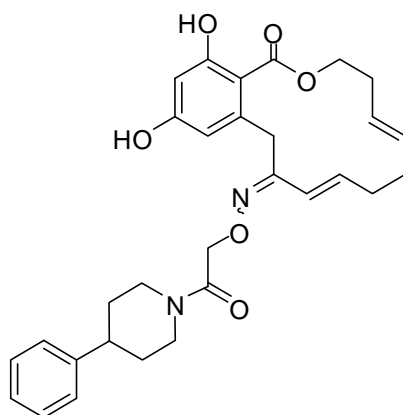

**1A1B1C4D7**

**1A1B1C4D7:** Mixture of isomers 1:1.  $^1H$  NMR ( $CDCl_3$ , 400 MHz)  $\delta$  11.65 (brs, 2H), 7.32-7.27 (m, 4H), 7.24-7.10 (m, 6H), 7.01 (d,  $J = 2.4$  Hz, 1H), 6.64-6.59 (m, 2H), 6.34-6.33 (m, 2H), 6.28-6.18 (m, 2H), 5.85 (d,  $J = 16$  Hz, 1H), 5.37-5.32 (m, 4H), 4.85 (s, 2H), 4.72-4.69 (m, 2H), 4.56-4.51 (m, 4H), 4.15 (d,  $J = 15.2$  Hz, 2H), 4.02 (d,  $J = 15.2$  Hz, 2H), 3.96-3.92 (m, 2H), 3.21-3.11 (m, 2H), 2.76-2.67 (m, 4H), 2.54-2.45 (m, 4H), 2.12-2.02 (m, 10H), 1.90-1.87 (m, 4H), 1.67-1.58 (m, 4H), 2 OH signals are not visible; HRMS (MALDI-TOF)  $m/z$   $[M + Na]^+$  calcd for  $C_{30}H_{34}NaN_2O_6$ : 541.2314; found: 541.2314.

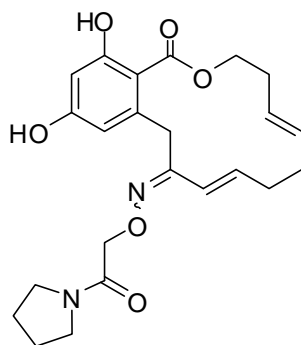

**1A1B1C4D17**

**1A1B1C4D17:** Mixture of isomers 1:1.  $^1H$  NMR ( $CDCl_3$ , 400 MHz)  $\delta$  11.65 (brs, 1H), 11.64 (brs, 1H), 8.70 (brs, 1H), 8.27 (brs, 1H), 7.04 (d,  $J = 2.4$  Hz, 1H), 6.64-6.60 (m, 2H), 6.26-6.11 (m, 2H), 6.32 (2d,  $J = 2.6$  Hz, 2H), 5.82 (d,  $J = 16$  Hz, 1H), 5.36-5.32 (m, 4H), 4.76 (s, 2H), 4.70 (s, 2H), 4.53 (brt,  $J = 5.2$  Hz, 4H), 4.33 (s, 2H), 4.05 (s, 2H), 3.51 (brt,  $J = 6.8$  Hz, 4H), 3.44

(q,  $J = 7.2$  Hz, 4H), 2.52-2.46 (m, 4H), 2.16-2.05 (m, 8H), 2.02-1.93 (m, 4H), 1.90-1.84 (m, 4H). HRMS (MALDI-TOF)  $m/z$   $[M + H]^+$  calcd for  $C_{23}H_{29}N_2O_6$ : 429.2025; found: 429.2003.

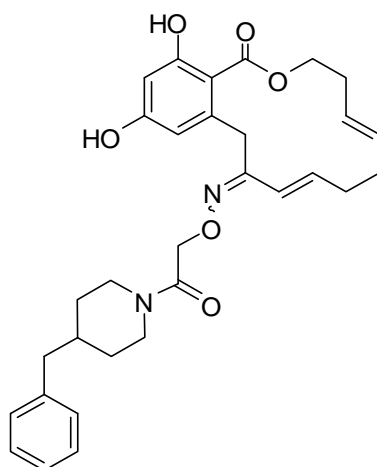

**1A1B1C4D8**

**1A1B1C4D8:** Mixture of isomers 1:1.  $^1H$  NMR ( $CDCl_3$ , 400 MHz)  $\delta$  11.66 (brs, 1H), 11.64 (brs, 1H), 8.15 (brs, 1H), 7.86 (brs, 1H), 7.31-7.27 (m, 4H), 7.21-7.18 (m, 2H), 7.15-7.10 (m, 4H), 7.00 (brs, 1H), 6.60 (d,  $J = 15.6$  Hz, 1H), 6.59 (d,  $J = 2.4$  Hz, 1H), 6.32 (2 x d,  $J = 2.4$  Hz, 2H), 6.27-6.11 (m, 2H), 5.85 (d,  $J = 16$  Hz, 1H), 5.36-5.32 (m, 4H), 4.84 (s, 2H), 4.77 (s, 2H), 4.59-4.48 (m, 4H), 4.33 (s, 2H), 4.11 (d,  $J = 15.2$  Hz, 1H), 4.02 (d,  $J = 15.6$  Hz, 1H), 3.78-3.71 (m, 2H), 3.01-2.92 (m, 2H), 2.59-2.47 (m, 8H), 2.12-2.07 (m, 8H), 1.82-1.68 (m, 6H), 1.36-1.30 (m, 8H). HRMS (MALDI-TOF)  $m/z$   $[M + H]^+$  calcd for  $C_{31}H_{37}N_2O_6$ : 533.2651; found: 533.2625.

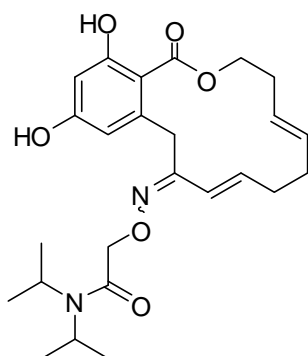

**1A1B1C4D20**

**1A1B1C4D20:** Mixture of isomers 1:1.  $^1H$  NMR ( $CDCl_3$ , 400 MHz)  $\delta$  11.72 (brs, 1H), 11.71 (brs, 1H), 6.71 (d,  $J = 2.4$  Hz, 1H), 6.67 (d,  $J = 16.4$  Hz, 1H), 6.52 (d,  $J = 2.4$  Hz, 1H), 6.35 (2 x d,

$J = 3.0$  Hz, 2H), 6.31-6.18 (m, 2H), 5.93 (d,  $J = 16.4$  Hz, 1H), 5.41-5.36 (m, 4H), 4.86 (s, 2H), 4.77 (s, 2H), 4.60-4.54 (m, 4H), 4.37 (s, 2H), 4.10 (s, 2H), 3.94-3.86 (m, 2H), 3.62-3.49 (m, 2H), 2.55-2.49 (m, 4H), 2.20-2.10 (m, 8H), 1.44-1.25 (m, 24H), 2 OH signals are not visible; HRMS (MALDI-TOF)  $m/z$   $[M + H]^+$  calcd for  $C_{25}H_{35}N_2O_6$ : 459.2495; found: 459.2514

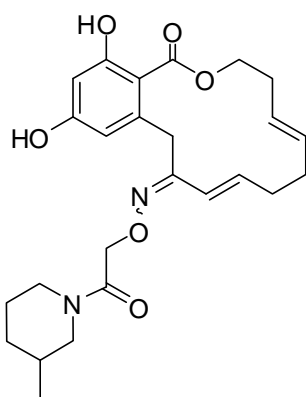

**1<sub>A1B1C4D3</sub>**

**1<sub>A1B1C4D3</sub>**: Mixture of isomers 1:1.  $^1H$  NMR ( $CDCl_3$ , 400 MHz)  $\delta$  11.65 (brs, 1H), 11.64 (brs, 1H), 7.00 (d,  $J = 2.4$  Hz, 1H), 6.61-6.57 (m, 2H), 6.33-6.32 (m, 2H), 6.25-6.10 (m, 2H), 5.82 (d,  $J = 16$  Hz, 1H), 5.36-5.31 (m, 4H), 4.85 (s, 2H), 4.78 (s, 2H), 4.58-4.48 (m, 4H), 4.41-4.32 (m, 4H), 4.12-3.98 (m, 2H), 3.72-3.58 (m, 2H), 3.02-2.93 (m, 1H), 2.72-2.62 (m, 2H), 2.53-2.45 (m, 4H), 2.35-2.28 (m, 1H), 2.16-2.04 (m, 8H), 1.86-1.39 (m, 8H), 1.17-1.07 (m, 2H), 0.93-0.88 (m, 6H), 2 OH signals are not visible; HRMS (MALDI-TOF)  $m/z$   $[M + H]^+$  calcd for  $C_{25}H_{33}N_2O_6$ : 457.2338; found: 457.2380.

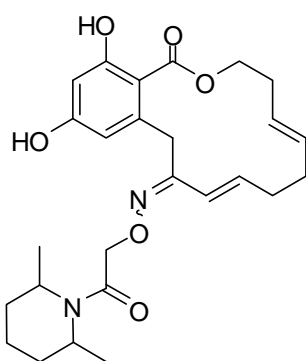

**1<sub>A1B1C4D6</sub>**

**1<sub>A1B1C4D6</sub>**: Mixture of isomers 1:1. <sup>1</sup>H NMR (CDCl<sub>3</sub>, 400 MHz) δ 11.67 (brs, 2H), 6.99 (s, 1H), 6.68-6.63 (m, 2H), 6.32 (d, *J* = 2.4 Hz, 1H), 6.31 (d, *J* = 2.8 Hz, 1H), 6.27-6.14 (m, 2H), 5.90 (d, *J* = 16 Hz, 1H), 5.37-5.34 (m, 4H), 4.77 (s, 2H), 4.63-4.46 (m, 4H), 4.36 (brs, 2H), 4.21 (t, *J* = 6 Hz, 4H), 4.05-3.92 (m, 4H), 2.55-2.46 (m, 4H), 2.17-2.06 (m, 8H), 1.37-1.28 (m, 12H), 0.93-0.86 (m, 12H), 2 OH signals are not visible; HRMS (MALDI-TOF) *m/z* [M + Na]<sup>+</sup> calcd for C<sub>26</sub>H<sub>34</sub>NaN<sub>2</sub>O<sub>6</sub>: 493.2314; found: 493.2314.

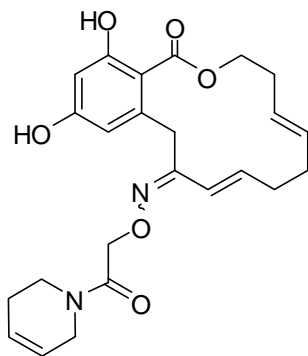

**1<sub>A1B1C4D9</sub>**

**1<sub>A1B1C4D9</sub>**: Mixture of isomers 1:1. <sup>1</sup>H NMR (CDCl<sub>3</sub>, 400 MHz) δ 11.62 (brs, 2H), 6.98 (m, 2H), 6.57 (m, 2H), 6.32 (m, 2H), 6.18 (m, 2H), 5.82 (d, *J* = 15.6 Hz, 1H), 5.67 (m, 2H), 5.33 (m, 4H), 4.87 (d, *J* = 13.6 Hz, 2H), 4.80 (d, *J* = 10.8 Hz, 2H), 4.53 (m, 3H), 4.33 (s, 2H), 4.05 (brs, 4H), 3.73 (m, 2H), 3.69 (q, *J* = 6 Hz, 2H), 3.52 (q, *J* = 5.2 Hz, 2H), 2.48 (m, 5H), 2.13 (m, 13H), 2 OH signals are not visible; HRMS (MALDI-TOF) *m/z* [M + Na]<sup>+</sup> calcd for C<sub>24</sub>H<sub>28</sub>NaN<sub>2</sub>O<sub>6</sub>: 463.1845; found: 463.1870.

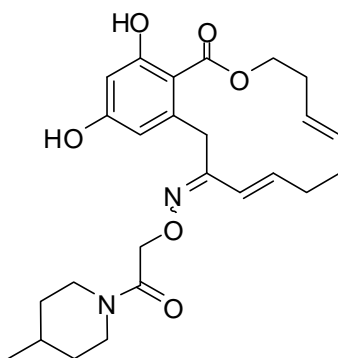

**1<sub>A1B1C4D4</sub>**

**1<sub>A1B1C4D4</sub>**: Mixture of isomers 1:1. <sup>1</sup>H NMR (CDCl<sub>3</sub>, 400 MHz) δ 11.66 (brs, 1H), 11.64 (brs, 1H), 8.29 (brs, 2H), 6.89 (d, *J* = 2.8 Hz, 1H), 6.59 (d, *J* = 16 Hz, 1H), 6.57 (d, *J* = 2.4 Hz, 1H),

6.33-6.32 (m, 2H), 6.24-6.09 (m, 2H), 5.79 (d,  $J = 16$  Hz, 1H), 5.34-5.30 (m, 4H), 4.85 (s, 2H), 4.78 (s, 2H), 4.56-4.48 (m, 4H), 4.31 (s, 2H), 4.10 (d,  $J = 15.6$  Hz, 1H), 4.05 (d,  $J = 15.6$  Hz, 1H), 3.80-3.71 (m, 2H), 3.06-2.96 (m, 2H), 2.61 (dt,  $J = 12.8, 2.6$  Hz, 2H), 2.52-2.46 (m, 4H), 2.16-2.05 (m, 8H), 1.71-1.58 (m, 6H), 1.17-1.05 (m, 4H), 0.94 (d,  $J = 5.6$  Hz, 3H), 0.93 (d,  $J = 5.6$  Hz, 3H), 2 OH signals are not visible; HRMS (MALDI-TOF)  $m/z$   $[M + Na]^+$  calcd for  $C_{25}H_{32}NaN_2O_6$ : 479.2158; found: 479.2182.

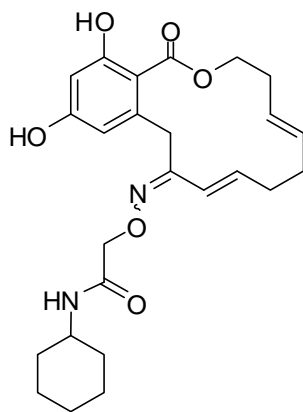

**1<sub>A1B1C4D24</sub>**

**1<sub>A1B1C4D24</sub>**: Mixture of isomers 1:1.  $^1H$  NMR ( $CDCl_3$ , 400 MHz)  $\delta$  11.60 (brs, 1H), 11.47 (brs, 1H), 8.58 (brs, 2H), 6.53 (d,  $J = 16.4$  Hz, 1H), 6.50 (d,  $J = 2.4$  Hz, 1H), 6.35 (d,  $J = 2.4$  Hz, 1H), 6.34 (d,  $J = 2.4$  Hz, 1H), 6.30 (d,  $J = 2.4$  Hz, 1H), 6.31-6.27 (m, 2H), 6.14 (m, 1H), 5.39-5.31 (m, 4H), 4.61 (s, 2H), 4.56-4.53 (m, 6H), 4.33 (s, 2H), 4.09 (s, 2H), 3.86-3.75 (m, 2H), 2.53-2.48 (m, 4H), 2.17-2.09 (m, 8H), 1.93-1.86 (m, 4H), 1.70-1.55 (m, 8H), 1.39-1.11 (m, 8H), 2 OH signals are not visible; HRMS (MALDI-TOF)  $m/z$   $[M + Na]^+$  calcd for  $C_{25}H_{32}NaN_2O_6$ : 479.2158; found: 479.2157.

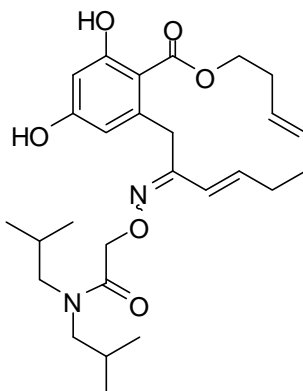

**1<sub>A1B1C4D19</sub>**

**1A1B1C4D19:** Mixture of isomers 1:1.  $^1\text{H}$  NMR ( $\text{CDCl}_3$ , 400 MHz)  $\delta$  11.65 (brs, 2H), 7.06 (d,  $J = 2.4$  Hz, 1H), 6.62-6.57 (m, 2H), 6.33 (d,  $J = 2.4$  Hz, 2H), 6.21-6.11 (m, 2H), 5.81 (d,  $J = 16.4$  Hz, 1H), 5.37-5.29 (m, 4H), 4.86 (s, 2H), 4.79 (s, 2H), 4.52 (brt,  $J = 5.2$  Hz, 4H), 4.31 (s, 2H), 4.02 (s, 2H), 3.21 (m, 4H), 3.09 (dd,  $J = 10.8, 8.0$  Hz, 4H), 2.52-2.44 (m, 4H), 2.11-1.91 (m, 12H), 0.95 (d,  $J = 6.8$  Hz, 6H), 0.93 (d,  $J = 6.8$  Hz, 6H), 0.88 (d,  $J = 6.8$  Hz, 6H), 0.86 (d,  $J = 6.8$  Hz, 6H), 2 OH signals are not visible; HRMS (MALDI-TOF)  $m/z$   $[\text{M} + \text{Na}]^+$  calcd for  $\text{C}_{27}\text{H}_{38}\text{NaN}_2\text{O}_6$ : 509.2627; found: 509.2626.

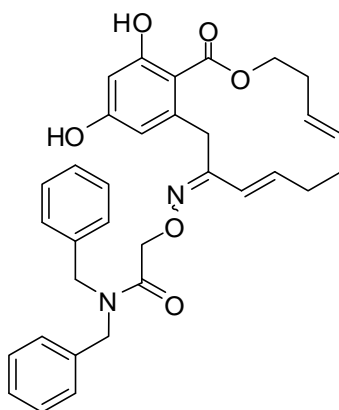

**1A1B1C4D21**

**1A1B1C4D21:** Mixture of isomers 1:1.  $^1\text{H}$  NMR ( $\text{CDCl}_3$ , 400 MHz)  $\delta$  11.67 (brs, 1H), 11.66 (brs, 1H), 7.38-7.28 (m, 12H), 7.22-7.14 (m, 8H), 6.94 (d,  $J = 2.4$  Hz, 1H), 6.57-6.53 (m, 2H), 6.33 (brd,  $J = 2.4$  Hz, 2H), 6.22-6.12 (m, 2H), 5.85 (d,  $J = 16$  Hz, 1H), 5.35-5.32 (m, 4H), 4.93 (s, 2H), 4.86 (s, 2H), 4.62 (s, 2H), 4.60 (s, 2H), 4.53 (brt,  $J = 5.2$  Hz, 4H), 4.46 (s, 2H), 4.43 (s, 2H), 4.30 (s, 2H), 4.07 (s, 2H), 3.52-3.46 (m, 4H), 2.16-2.07 (m, 8H), , 2 OH signals are not visible; HRMS (MALDI-TOF)  $m/z$   $[\text{M} + \text{Na}]^+$  calcd for  $\text{C}_{33}\text{H}_{34}\text{NaN}_2\text{O}_6$ : 577.2314; found: 577.2278

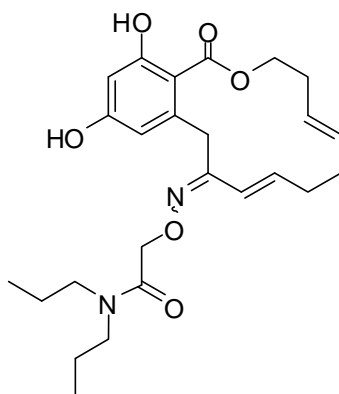

**1<sub>A1B1C4D25</sub>**

**1<sub>A1B1C4D25</sub>**: Mixture of isomers 1:1. <sup>1</sup>H NMR (CDCl<sub>3</sub>, 400 MHz) δ 11.66 (brs, 1H), 11.65 (brs, 1H), 7.05 (d, *J* = 2.4 Hz, 1H), 6.62-6.55 (m, 2H), 6.32-6.29 (m, 2H), 6.23-6.11 (m, 2H), 5.82 (d, *J* = 16 Hz, 1H), 5.34-5.29 (m, 4H), 4.85 (s, 2H), 4.77 (s, 2H), 4.54 (brt, *J* = 5.2 Hz, 4H), 4.32 (s, 2H), 4.04 (s, 2H), 3.32-3.27 (m, 4H), 3.21-3.15 (m, 4H), 2.52-2.42 (m, 4H), 2.10-2.04 (m, 8H), 1.67-1.51 (m, 8H), 0.96-0.86 (m, 12H), 2 OH signals are not visible; HRMS (MALDI-TOF) *m/z* [M + Na]<sup>+</sup> calcd for C<sub>25</sub>H<sub>34</sub>NaN<sub>2</sub>O<sub>6</sub>: 481.2314; found: 481.2307.

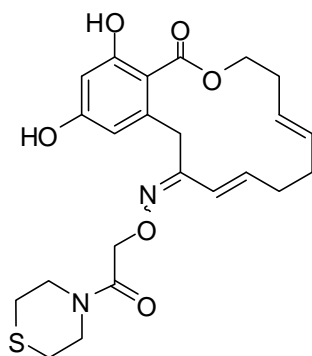

**1<sub>A1B1C4D11</sub>**

**1<sub>A1B1C4D11</sub>**: Mixture of isomers 1:1. <sup>1</sup>H NMR (CDCl<sub>3</sub>, 400 MHz) δ 11.63 (brs, 2H), 6.88 (d, *J* = 2.0 Hz, 1H), 6.55 (d, *J* = 16.4 Hz, 1H), 6.43 (d, *J* = 2.4 Hz, 1H), 6.32 (d, *J* = 2.4 Hz, 1H), 6.30 (d, *J* = 2 Hz, 1H), 6.28-6.13 (m, 2H), 5.84 (d, *J* = 16.1 Hz, 1H), 5.36-5.33 (m, 4H), 4.82 (s, 2H), 4.73 (s, 2H), 4.54 (t, *J* = 5.5 Hz, 4H), 4.32 (s, 2H), 4.09 (s, 2H), 3.91-3.85 (m, 4H), 3.79-3.70 (m, 4H), 2.65-2.60 (m, 8H), 2.49 (brt, *J* = 5.1 Hz, 4H), 2.17-2.04 (m, 8H), 2 OH signals are not visible; HRMS (MALDI-TOF) *m/z* [M + H]<sup>+</sup> calcd for C<sub>23</sub>H<sub>29</sub>N<sub>2</sub>O<sub>6</sub>S: 461.1746; found: 461.1765.

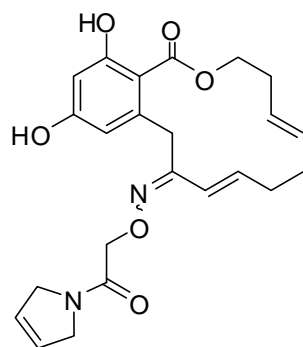

**1A1B1C4D15**

**1A1B1C4D15:** Mixture of isomers 1:1.  $^1\text{H}$  NMR ( $\text{CDCl}_3$ , 400 MHz)  $\delta$  11.64 (brs, 2H), 6.98 (d,  $J = 2.3$  Hz, 1H), 6.61 (d,  $J = 16.3$  Hz, 1H), 6.58 (d,  $J = 2.4$  Hz, 1H), 6.31 (2d,  $J = 2.2$  Hz, 2H), 6.27-6.12 (m, 2H), 5.87-5.78 (m, 5H), 5.45-5.33 (m, 4H), 4.74 (s, 2H), 4.69 (s, 2H), 4.53 (t,  $J = 5.3$  Hz, 4H), 4.33 (s, 2H), 4.28-4.25 (m, 8H), 4.05 (s, 2H), 2.52-2.46 (m, 4H), 2.17-2.05 (m, 8H), 2 OH signals are not visible; HRMS (MALDI-TOF)  $m/z$   $[\text{M} + \text{H}]^+$  calcd for  $\text{C}_{23}\text{H}_{27}\text{N}_2\text{O}_6$ : 427.1869; found: 427.1902.

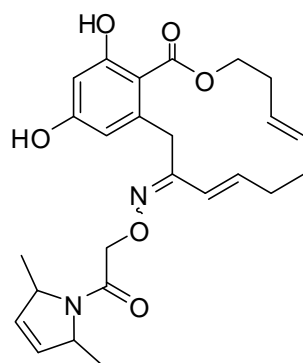

**1A1B1C4D16**

**1A1B1C4D16:** Mixture of isomers 1:1.  $^1\text{H}$  NMR ( $\text{CDCl}_3$ , 400 MHz)  $\delta$  11.68 (brs, 2H), 7.16 (d,  $J = 2.8$  Hz, 1H), 6.63 (d,  $J = 16.3$  Hz, 1H), 6.60 (d,  $J = 2.0$  Hz, 1H), 6.31 (brs, 2H), 6.26-6.13 (m, 2H), 5.85 (d,  $J = 16.0$  Hz, 1H), 5.77-5.76 (m, 4H), 5.44-5.34 (m, 4H), 4.87-4.59 (m, 10H), 4.48-4.43 (m, 2H), 4.33 (brs, 2H), 4.19 (d,  $J = 15.3$  Hz, 1H), 3.91 (d,  $J = 15.3$  Hz, 1H), 2.54-2.44 (m, 4H), 2.19-2.05 (m, 8H), 1.36-1.30 (m, 12H), 2 OH signals are not visible; HRMS (MALDI-TOF)  $m/z$   $[\text{M} + \text{H}]^+$  calcd for  $\text{C}_{25}\text{H}_{31}\text{N}_2\text{O}_6$ : 455.2182; found: 455.2195.



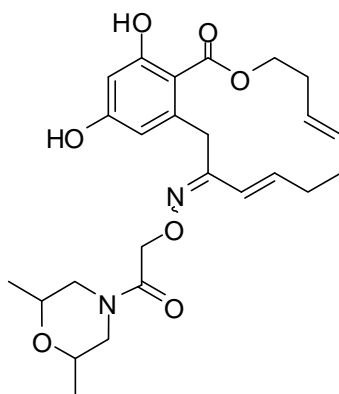

**1<sub>A1B1C4D14</sub>**

**1<sub>A1B1C4D14</sub>**: Mixture of isomers 1:1. <sup>1</sup>H NMR (CDCl<sub>3</sub>, 400 MHz) δ 11.66 (brs, 1H), 11.63 (brs, 1H), 6.93 (d, *J* = 2.4 Hz, 1H), 6.57 (d, *J* = 16.0 Hz, 1H), 6.52 (d, *J* = 2.4 Hz, 1H), 6.32 (d, *J* = 2.4 Hz, 1H), 6.31 (d, *J* = 2.4 Hz, 1H), 6.29-6.12 (m, 2H), 5.84 (d, *J* = 16.0 Hz, 1H), 5.38-5.32 (m, 4H), 4.91-4.71 (m, 4H), 4.59-4.49 (m, 4H), 4.37-4.26 (m, 4H), 4.13-3.97 (m, 4H), 3.78-3.68 (m, 2H), 3.62-3.52 (m, 2H), 3.35-3.15 (m, 4H), 2.50 (brt, *J* = 5.2 Hz, 4H), 2.18-2.08 (m, 8H), 1.24-1.18 (m, 12H), 2 OH signals are not visible; HRMS (MALDI-TOF) *m/z* [M + Na]<sup>+</sup> calcd for C<sub>25</sub>H<sub>32</sub>NaN<sub>2</sub>O<sub>7</sub>: 495.2107; found: 495.2067.

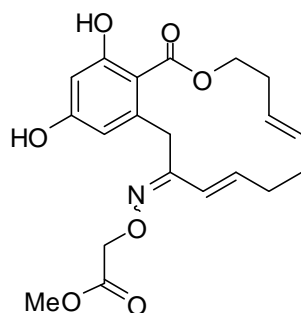

**1<sub>A1B1C4D26</sub>**

**1<sub>A1B1C4D26</sub>**: Mixture of isomers 1:1. <sup>1</sup>H NMR (CDCl<sub>3</sub>, 400 MHz) δ 11.70 (brs, 1H), 11.68 (brs, 1H), 6.84 (d, *J* = 2.4 Hz, 1H), 6.61 (d, *J* = 16.4 Hz, 1H), 6.53 (d, *J* = 2.4 Hz, 1H), 6.34 (d, *J* = 2.4 Hz, 1H), 6.32 (d, *J* = 2.4 Hz, 1H), 6.28-6.13 (m, 2H), 5.86 (d, *J* = 16.4 Hz, 1H), 5.38-5.33 (m, 4H), 4.75 (s, 2H), 4.68 (s, 2H), 4.57-4.54 (m, 4H), 4.36 (s, 2H), 4.08 (s, 2H), 3.79 (2s, 6H), 2.54-2.48 (m, 4H), 2.17-2.04 (m, 8H), 2 OH signals are not visible; HRMS (MALDI-TOF) *m/z* [M + Na]<sup>+</sup> calcd for C<sub>20</sub>H<sub>23</sub>NaNO<sub>7</sub>: 412.1373; found: 412.1322.

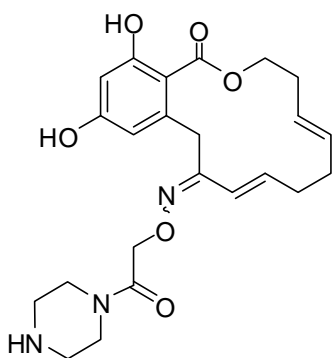

**1<sub>A1B1C4D12</sub>**

**1<sub>A1B1C4D12</sub>**: Mixture of isomers 1:1. <sup>1</sup>H NMR (CDCl<sub>3</sub>, 400 MHz) δ 6.94 (d, *J* = 2.4 Hz, 1H), 6.52 (d, *J* = 16.0 Hz, 1H), 6.34 (d, *J* = 2.8 Hz, 1H), 6.32 (d, *J* = 2.0 Hz, 1H), 6.29 (d, *J* = 2.4 Hz, 1H), 6.25-6.12 (m, 2H), 5.86 (d, *J* = 16.0 Hz, 1H), 5.38-5.32 (m, 4H), 4.85 (s, 2H), 4.71 (s, 2H), 4.57-4.52 (m, 4H), 4.35 (s, 2H), 4.14 (s, 2H), 3.73-3.58 (m, 8H), 3.02-2.87 (m, 8H), 2.54-2.48 (m, 4H), 2.14-2.09 (m, 8H), 4 OH signals and 2 NH signals are not visible; HRMS (MALDI-TOF) *m/z* [M + Na]<sup>+</sup> calcd for C<sub>23</sub>H<sub>29</sub>NaN<sub>3</sub>O<sub>6</sub>: 466.1954; found: 466.1938.

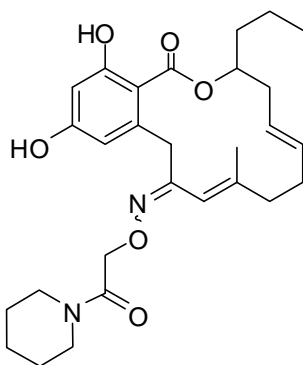

**1<sub>A1B3C2D1</sub>**

**1<sub>A1B3C2D1</sub>**: Mixture of isomers 1:1. <sup>1</sup>H NMR (CDCl<sub>3</sub>, 400 MHz) δ 11.94 (brs, 1H), 11.80 (brs, 1H), 6.80 (d, *J* = 2.4 Hz, 2H), 6.35 (d, *J* = 2.4 Hz, 2H), 5.45-5.09 (m, 6H), 4.93 (d, *J* = 14.4 Hz, 2H), 4.82-4.68 (m, 2H), 4.76 (d, *J* = 14.4 Hz, 2H), 4.28 (d, *J* = 14.8 Hz, 2H), 4.06 (d, *J* = 14.4 Hz, 2H), 3.63-3.33 (m, 8H), 2.34-1.96 (m, 10H), 1.70-1.55 (m, 12H), 1.45-1.29 (m, 10H), 1.75 (s, 3H), 1.25 (s, 3H), 0.94 (t, *J* = 7.2 Hz, 6H), 2 OH signals are not visible; HRMS (MALDI-TOF) *m/z* [M + Na]<sup>+</sup> calcd for C<sub>28</sub>H<sub>38</sub>NaN<sub>2</sub>O<sub>6</sub>: 521.2627; found: 521.2630.

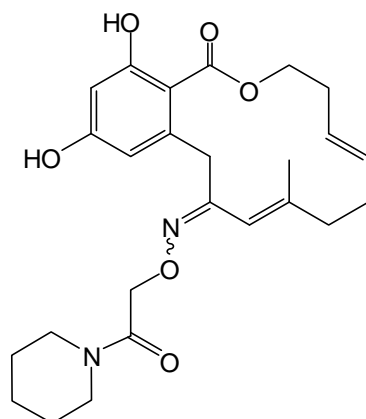

**1<sub>A1B3C4D1</sub>**

**1<sub>A1B3C4D1</sub>**: Mixture of isomers 1:1. <sup>1</sup>H NMR (CDCl<sub>3</sub>, 400 MHz) δ 11.92 (brs, 1H), 11.84 (brs, 1H), 7.08-7.05 (m, 2H), 6.35-6.33 (m, 2H), 5.50-5.20 (m, 6H), 4.87 (s, 2H), 4.73 (s, 2H), 4.44-4.35 (m, 4H), 3.92 (s, 2H), 3.60-3.49 (m, 4H), 3.44-3.33 (m, 4H), 2.47-2.38 (m, 4H), 2.21-1.99 (m, 8H), 1.81-1.76 (m, 6H), 1.70-1.62 (m, 14H), 2 OH signals are not visible; HRMS (MALDI-TOF) m/z [M + H]<sup>+</sup> calcd for C<sub>25</sub>H<sub>33</sub>N<sub>2</sub>O<sub>6</sub>: 457.2338; found: 457.2339.

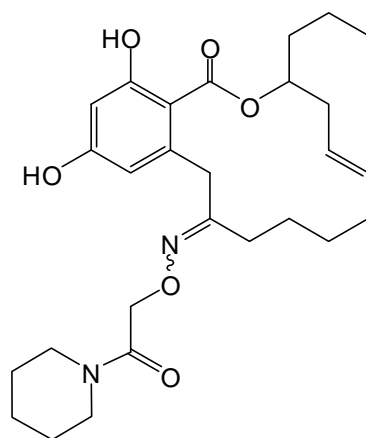

**1<sub>A1B2C2D1</sub>**

**1<sub>A1B2C2D1</sub>**: Mixture of isomers 1:1. <sup>1</sup>H NMR (CDCl<sub>3</sub>, 400 MHz) δ 11.61 (brs, 1H), 11.57 (brs, 1H), 7.86 (brs, 1H), 7.64 (brs, 1H), 7.00 (d, *J* = 2.4 Hz, 1H), 6.51 (d, *J* = 2.4 Hz, 1H), 6.34 (brd, *J* = 2.0 Hz, 2H), 5.46-5.32 (m, 4H), 5.28-5.22 (m, 2H), 4.90 (d, *J* = 14.8 Hz, 1H), 4.83 (d, *J* = 14.4 Hz, 1H), 4.72 (d, *J* = 14.4 Hz, 1H), 4.71 (d, *J* = 14.8 Hz, 1H), 4.35 (d, *J* = 16.0 Hz, 1H), 4.25-4.17 (m, 3H), 4.09 (d, *J* = 15.2 Hz, 1H), 3.62-3.51 (m, 4H), 3.43-3.38 (m, 4H), 2.67-2.61 (m, 2H), 2.35-2.28 (m, 2H), 2.06-1.95 (m, 4H), 1.90-1.78 (m, 6H), 1.68-1.58 (m,

14H), 1.44-1.31 (m, 11H), 0.94 (m, 6H). HRMS (MALDI-TOF)  $m/z$   $[M + H]^+$  calcd for  $C_{27}H_{39}N_2O_6$ : 487.2808; found: 487.2806.

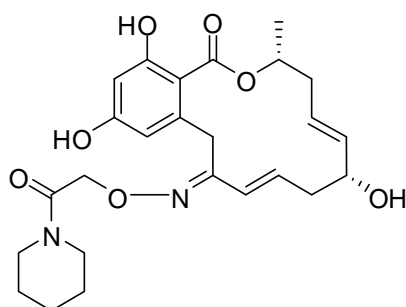

**1<sub>AIB5CID1</sub>**

**1<sub>AIB5CID1-1</sub>**:  $^1H$  (Z-isomer,  $CDCl_3$ , 400 MHz, 25 °C)  $\delta$  10.4 (s, 1H), 6.67 (d,  $J = 14.3$  Hz, 1H), 6.55 (d,  $J = 2.3$  Hz, 1H), 6.31 (d,  $J = 2.4$  Hz, 1H), 5.90-5.81 (m, 1H), 5.66 (dt,  $J = 16.0, 7.9$  Hz, 1H), 5.54-5.39 (m, 2H), 4.78 (s, 2H), 4.17 (m, 2H), 3.82 (d,  $J = 14.6$  Hz, 1H), 3.56-3.51 (m, 2H), 3.40-3.38 (m, 2H), 2.47-2.41 (m, 2H), 2.35-2.29 (m, 2H), 1.64-1.56 (m, 6H), 1.46 (d,  $J = 2.4$  Hz, 3H), 2 OH signals are not visible.

$^1H$  (E-isomer,  $CDCl_3$ , 400 MHz, 25 °C)  $\delta$  6.98 (d,  $J = 2.49$  Hz, 1H), 6.30 (d,  $J = 2.5$  Hz, 1H), 5.95 (d,  $J = 16.1$  Hz, 1H), 5.85-5.77 (m, 1H), 5.67 (dt,  $J = 16.0, 7.9$  Hz, 1H), 5.32-5.43 (m, 2H), 4.79 (d,  $J = 3.9$  Hz, 2H), 4.17 (m, 2H), 3.82 (d,  $J = 14.6$  Hz, 1H), 3.56-3.51 (m, 2H), 3.40-3.38 (m, 2H), 2.47-2.41 (m, 2H), 2.35-2.29 (m, 2H), 1.64-1.56 (m, 6H), 1.46 (d,  $J = 2.4$  Hz, 3H), 3 OH signals are not visible.

**1<sub>AIB5CID1-1</sub>**:  $^1H$  (E-isomer, MeOD, 400 MHz, 25 °C)  $\delta$  8.43 (s, 1H), 6.26 (d,  $J = 2.4$  Hz, 1H), 6.24 (d,  $J = 2.4$  Hz, 1H), 6.05 (d,  $J = 16.4$  Hz, 1H), 5.75-5.60 (m, 2H), 5.51-5.47 (m, 1H), 5.50-5.44 (td,  $J = 15.6, 5.6$  Hz, 1H), 4.88 (d,  $J = 16.4$  Hz, 2H), 4.44 (d,  $J = 16.4$  Hz, 1H), 3.54-3.51 (m, 2H), 3.36-3.34 (m, 2H), 2.66-2.58 (m, 2H), 2.35-2.31 (m, 2H), 2.04-1.96 (m, 2H), 1.64-1.53 (m, 6H), 1.44 (d,  $J = 6.4$  Hz, 3H), two OH signals are not visible.

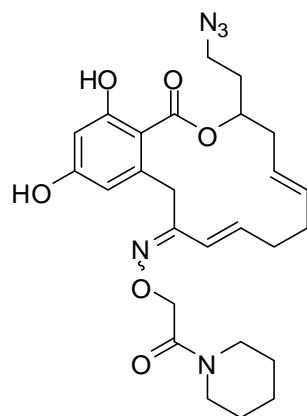

**1A1B1C7D1**

**1A1B1C7D1:** HRMS (MALDI-TOF)  $m/z$   $[M + H]^+$  calcd for C<sub>26</sub>H<sub>34</sub>N<sub>5</sub>O<sub>6</sub>: 512.2431; found: 512.2406.

### General Scheme for the synthesis of 6:

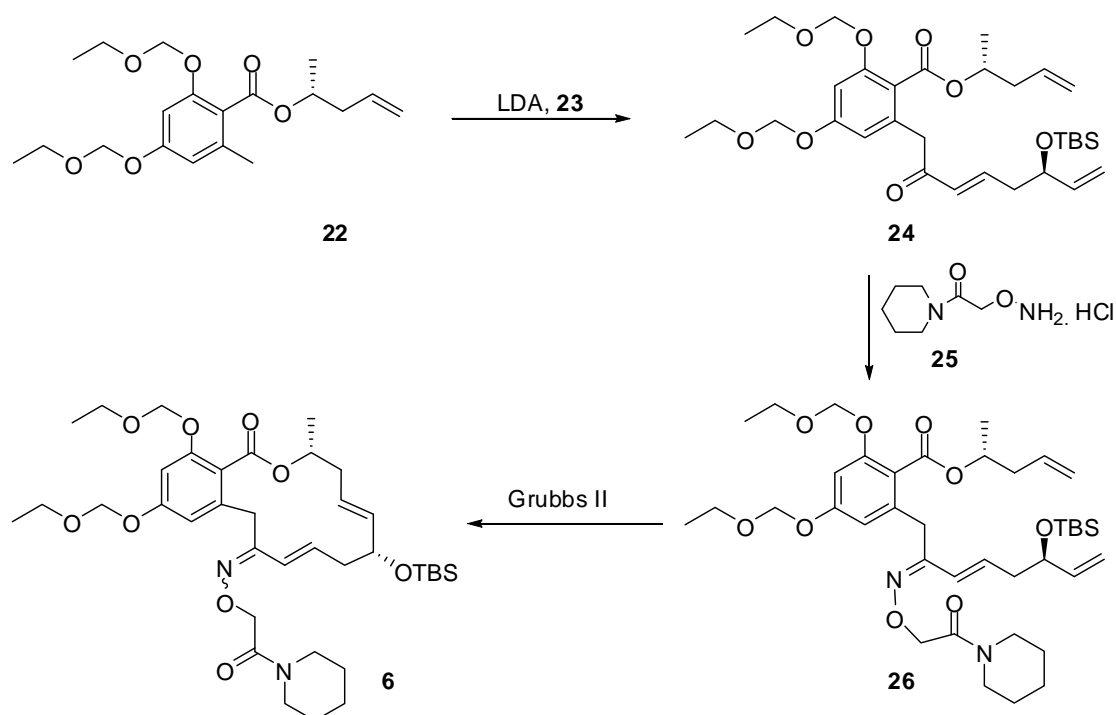

### Synthesis of Weinreb amide 23.

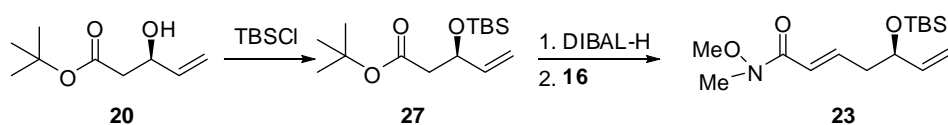

**Synthesis of TBS protected alcohol 27.** To the solution of the previously prepared **20** (8.35g, 48.5 mmol) in vinyl acetate (120 mL) was added Amano lipase PS-C II (750mg, 15 mg/mmol) at 30 °C.<sup>2</sup> The reaction was stirred for 60 hours. After filtration, the solution was concentrated and the crude was purified by flash chromatography (petroleum ether/EtOAc, 15/1 to 5/1) to give the desired compound (3.86 g) in a 46% yield. To a solution of this chiral alcohol (3.75 g, 21.7 mmol) in DMF (60 mL) at 0 °C under nitrogen atmosphere, was added imidazole (2.96 g, 43.5 mmol, 2.0 equiv.) and TBSCl (3.93 g, 26.0 mmol, 1.2 equiv), then the reaction was allowed to warm to 23 °C and stirred for 5 hours. The reaction was then quenched with sat. NH<sub>4</sub>Cl<sub>aq</sub> solution (100 mL) and extracted with EtOAc (100 mL x 3), the combined organic phases were washed with brine (100 mL) and dried over anhydrous Na<sub>2</sub>SO<sub>4</sub> (10.0 g). Filtration and evaporation of the solvents under reduced pressure followed

<sup>2</sup> C.-H. Tan, A. B. Holmes *Chem. Eur. J.* **2001**, 7,1845

by flash chromatography (silica gel, 1/50 EtOAc/petroleum ether) afforded desired compound **27** (5.85 g) in a 93% yield.  $R_f = 0.39$  (silica gel, EtOAc/petroleum ether 1:8);  $^1\text{H}$  ( $\text{CDCl}_3$ , 400 MHz, 25 °C)  $\delta$  5.86 (ddd,  $J = 15.9, 10.4, 5.2$  Hz, 1H), 5.20 (dd,  $J = 16.0, 2.8$  Hz, 1H), 5.05 (dd,  $J = 10.4, 2.8$  Hz, 1H), 4.56-4.51 (m, 1H), 2.46 (dd,  $J = 14.8, 7.6$  Hz 1H), 2.34 (dd,  $J = 14.8, 6.0$  Hz 1H), 1.44 (s, 9H), 0.88 (s, 9H), 0.05 (2 x s, 6H).  $^{13}\text{C}$  NMR ( $\text{CDCl}_3$ , 400 MHz, 25 °C)  $\delta$  170.3, 140.5, 114.4, 80.4, 70.9, 44.8, 28.1 (x 3), 25.8 (x 3), 18.1, -4.4, -5.0.

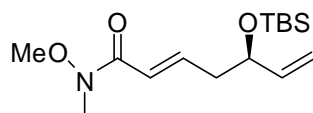

**23**

**Synthesis of TBS protected hydroxyWeinreb amide **23**.** To a solution of **27** (5.85 g, 20.4 mmol) in toluene (100 mL) DIBAL (24.5 mL, 1M in toluene, 1.2 equiv) was added at -78 °C and the reaction was kept stirring at the same temperature for half an hour. Then an aqueous saturated tartrate salt solution (100 mL) was added to the reaction and stirred for 2 hours until the mixture became clear. The two phases were separated and extracted with  $\text{CH}_2\text{Cl}_2$  (100 mL x 2), washed with brine (100 mL x 2) and dried over  $\text{Na}_2\text{SO}_4$  (10 g). After removal of the solvent, the residue (4.33 g) obtained was used for the next step without any further purification. To a solution of the previously obtained aldehyde (4.33 g) in  $\text{CH}_2\text{Cl}_2$  (100 mL) was added N-methoxy-N-methyl-2-(triphenylphosphoranylidene)acetamide (7.33 g, 20.2 mmol, 1.0 equiv) at 23 °C. The reaction was stirred overnight. Evaporation of the solvents under reduced pressure followed by flash chromatography (silica gel, 1/20, 1/10, 1/3 EtOAc/petroleum ether) afforded the desired compound **23** (4.25 g) in a 71 % yield over two steps.  $R_f = 0.20$  (silica gel, EtOAc/petroleum ether 1:9);  $^1\text{H}$  ( $\text{CDCl}_3$ , 400 MHz, 25 °C)  $\delta$  6.95 (dt,  $J = 15.2, 7.2$  Hz, 1H), 6.41 (d,  $J = 15.6$  Hz, 1H), 5.84 (ddd,  $J = 15.9, 10.4, 5.2$  Hz, 1H), 5.18 (dd,  $J = 16.0, 2.8$  Hz, 1H), 5.05 (dd,  $J = 10.4, 2.8$  Hz, 1H), 4.26 (q,  $J = 6.0$  Hz 1H), 3.67 (s, 3H), 3.22 (s, 3H), 2.42 (t,  $J = 7.2$  Hz, 2H), 0.88 (s, 9H), 0.03 (2 x s, 6H).  $^{13}\text{C}$  ( $\text{CDCl}_3$ , 400 MHz, 25 °C)  $\delta$  166.6, 143.5, 140.6, 120.9, 114.3, 72.7, 61.6, 41.4, 32.3, 25.8 (x 3), 18.2, -4.5, -4.9.

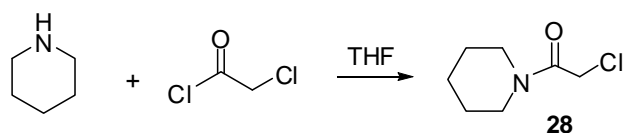

**Synthesis of compound 28:** To a solution of piperidine (51.9 mL, 525 mmol, 2.1 equiv) in THF (1000 mL) was added chloroacetyl chloride (19.9 mL, 250 mmol, 1.0 equiv) slowly at 0 °C under nitrogen atmosphere. The reaction was allowed to warm to 23 °C, and stirred for 1 hour. The mixture was then extracted with EtOAc (2 x 500 mL) from sat.  $\text{NH}_4\text{Cl}_{\text{aq}}$  solution, the combined organic layers were washed with brine (300 mL), dried over anhydrous  $\text{Na}_2\text{SO}_4$ . After filtration and evaporation under reduced pressure, the crude product (36.4 g) was used directly for the next step without further purification:  $^1\text{H}$  NMR ( $\text{CDCl}_3$ , 400 MHz, 25 °C)  $\delta$  4.06 (s, 2H), 3.54 (t,  $J = 5.5$  Hz, 2H), 3.43 (t,  $J = 5.2$  Hz, 2H), 1.70-1.60 (m, 4H), 1.60-1.51 (m, 2H);  $^{13}\text{C}$  NMR ( $\text{CDCl}_3$ , 100 MHz, 25 °C) 164.9, 47.5, 43.4, 41.3, 26.4, 25.5, 24.4.

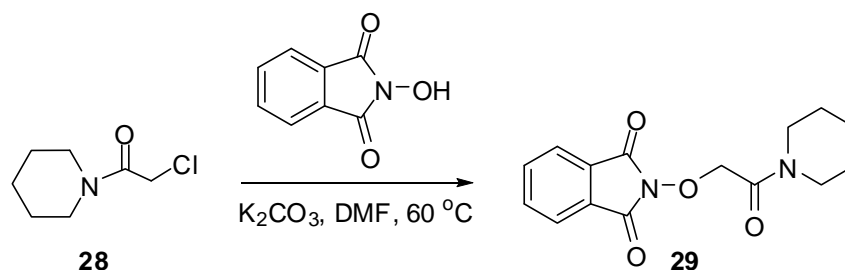

**Synthesis of compound 29:** To a suspension of N-hydroxyphthalimide (44.0 g, 270 mmol, 1.2 equiv) in DMF (600 mL),  $\text{K}_2\text{CO}_3$  (46.6 g, 337 mmol, 1.5 equiv) was added in portions. Then a solution of **28** (36.4 g, 225 mmol, 1.0 equiv) in DMF (50 mL) was added by syringe. The reaction was heated to 60-65 °C for 3 hours. Then, the solvent was evaporated under reduced pressure, and the residue obtained was dissolved in  $\text{CH}_2\text{Cl}_2$  (200 mL x 3) and



washed with sat.  $\text{NH}_4\text{Cl}_{\text{aq}}$  solution (200 mL). The combined organic layers were washed with brine (200 mL) and dried over  $\text{Na}_2\text{SO}_4$ . The desired product precipitated during the evaporation, after filtration, gave **29** as the white solid in 70% yield.  $^1\text{H}$  NMR ( $\text{CDCl}_3$ , 400 MHz, 25 °C)  $\delta$  7.86-7.71 (m, 4H), 4.84 (s, 2H), 3.63 (t,  $J = 5.3$  Hz, 2H), 3.57 (t,  $J = 5.4$  Hz, 2H), 1.74-1.65 (m, 4H), 1.65-1.57 (m, 2H);  $^{13}\text{C}$  NMR ( $\text{CDCl}_3$ , 100 MHz, 25 °C) 164.0, 163.0 (x 2), 134.7 (x 2), 128.8 (x 2), 123.7 (x 2), 75.9, 46.9, 43.1, 26.3, 25.3, 24.5.

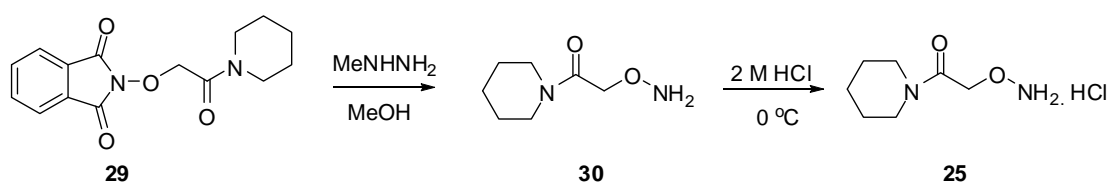

**Synthesis of hydroxylamine 25.** To a suspension of **29** (38.9 g, 135 mmol, 1.0 equiv) in MeOH (270 mL) was added  $\text{MeNHNH}_2$  (7.48 mL, 142 mmol, 1.05 equiv) by syringe at 0 °C. The reaction was allowed to warm up to 23 °C and stirred for 1 hour. The solvent was evaporated under reduced pressure, water (150 mL) was added and the precipitated obtained was filtered. After removal of water, the crude product was redissolved in MeOH (150 mL), concentrated HCl (25.0 mL, 12 mmol/mL, 2.0 equiv) was added dropwise at 0 °C. After stirring for 1 hour, the solvent was evaporated and the residue obtained was recrystallized from MeOH and ether to give **25** as a white solid (20.2 g, 77%).  $^1\text{H}$  NMR ( $\text{CDCl}_3$ , 400 MHz, 25 °C)  $\delta$  4.89 (bs, 4H), 3.60 (t,  $J = 5.4$  Hz, 2H), 3.34 (t,  $J = 5.4$  Hz, 2H), 1.77-1.68 (m, 2H), 1.68-1.56 (m, 4H);  $^{13}\text{C}$  NMR ( $\text{CD}_3\text{OD}$ , 100 MHz, 25 °C) 167.4, 71.5, 46.6, 44.0, 27.3, 26.6, 25.3.

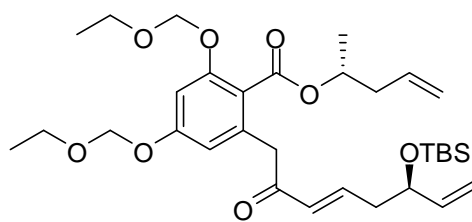

**24**

**Synthesis of ketone 24.** A solution of ester **22** (3.29 g, 9.3 mmol) in anhydrous THF (60 mL) at  $-78\text{ }^{\circ}\text{C}$  was treated with freshly prepared LDA (0.56 M, 18.6 mmol, 2.0 equiv) via cannula. After 3min, a solution of Weinreb amide **23** (2.70 g, 8.8 mmol, 0.95 equiv) in THF (3 mL) at  $-78\text{ }^{\circ}\text{C}$  was added by syringe. The resulting mixture was then stirred for 15 minutes and the reaction was quenched by addition of sat.  $\text{NH}_4\text{Cl}_{\text{aq}}$  solution. Upon warming to  $23\text{ }^{\circ}\text{C}$ , the reaction mixture was extracted with EtOAc (30 mL x 2), and the combined organic layers were washed with brine (50 mL), dried over  $\text{Na}_2\text{SO}_4$  and concentrated. The residue was purified by flash chromatography (petroleum ether/EtOAc, 8/1) to give **24** (2.3 g) in 42% yield.  $R_f = 0.39$  (EtOAc/petroleum ether 1:9);  $^1\text{H NMR}$  ( $\text{CDCl}_3$ , 400 MHz,  $25\text{ }^{\circ}\text{C}$ )  $\delta$  6.85 (dt,  $J = 15.2, 7.2\text{ Hz}$ , 1H), 6.80 (d,  $J = 2.4\text{ Hz}$ , 1H), 6.48 (d,  $J = 2.4\text{ Hz}$ , 1H), 6.16 (d,  $J = 15.2\text{ Hz}$ , 1H), 5.85-5.76 (m, 2H), 5.18 (s, 2H), 5.15 (s, 2H), 5.11-5.03 (m, 5H), 4.25-4.23 (m, 1H), 3.91 (d,  $J = 16.4\text{ Hz}$ , 1H), 3.83 (d,  $J = 16.4\text{ Hz}$ , 1H), 3.71-3.65 (m, 4H), 2.45-2.31 (m, 4H), 1.27 (d,  $J = 6.4\text{ Hz}$ , 3H), 1.22-1.17 (m, 6H), 0.87 (s, 9H), 0.06 (s, 3H), 0.05 (s, 3H);  $^{13}\text{C NMR}$  ( $\text{CDCl}_3$ , 400 MHz,  $25\text{ }^{\circ}\text{C}$ )  $\delta$  195.7, 167.1, 159.0, 156.2, 143.9, 142.2, 140.4, 134.8, 133.8, 131.2, 117.5, 114.5, 114.0, 111.2, 102.5, 93.5, 93.0, 72.6, 71.0, 64.3, 60.9, 44.7, 41.3, 40.1, 25.7 (x 3), 23.1, 19.4, 15.0, -4.5, -4.9.



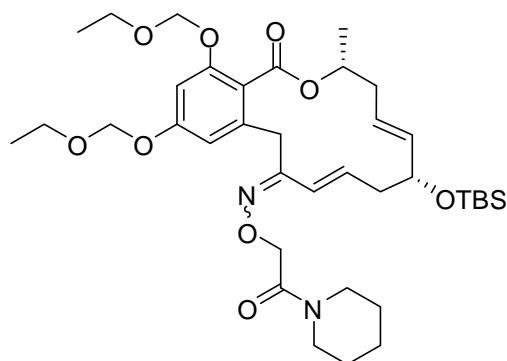

**6**

**Synthesis of compound 6.** A solution of **26** (9.40 g, 12.8 mmol) in toluene (450 mL) was degassed for 20 min under nitrogen atmosphere and then heated to 80°C. Catalyst Grubbs' II (545 mg, 0.64 mmol, 0.05 equiv.) was added and stirred at 80°C for 5 hours. After cooling down to 23 °C, the reaction was treated with DMSO (3 mL, 60 equiv. to catalyst) for 1 day. The mixture was passed through silica pad, and washed with petroleum ether/EtOAc 1:1, and then 1:2. The combined filtrates were concentrated under reduced pressure and the residue was purified by flash chromatography (petroleum ether/EtOAc, 2/1) to afford **6** (9.0 g, quantitative) as a mixture of *E/Z* isomers in the ratio of 1 to 1. <sup>1</sup>H NMR (CDCl<sub>3</sub>, 400 MHz, 25 °C) δ 6.78 (d, *J*=17.6 Hz, 1H), 6.70 (s, *J*=1.6 Hz, 1H), 6.69 (d, *J*=1.6 Hz, 1H), 6.62 (d, *J*=1.6 Hz, 1H), 6.53 (d, *J*=1.6 Hz, 1H), 6.08 (d, *J*=16.8 Hz, 1H), 5.79-5.70 (m, 2H), 5.36-5.34 (m, 4H), 5.18-5.05 (m, 10H), 4.80 (s x 2, 4H), 3.86-3.83 (m, 4H), 3.72-3.66 (m, 12H), 3.58 (m, 2H), 3.49 (m, 2H); 3.43-3.38 (m, 4H), 2.45-2.13 (m, 8H), 1.63-1.55 (m, 12H), 1.41 (d x 2, *J*=6.4 Hz, 6H), 1.23-1.17 (m, 12H), 0.84 (2 x s, 18H), 0.01 (s x 2, 6H), -0.01 (s x 2, 6H).

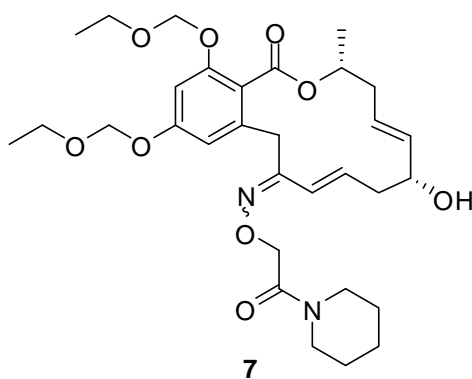

**Deprotection of the TBS group, synthesis of compound 7.** A solution of **6** (140 mg, 0.2 mmol) in THF (3.0 mL) was treated with a solution of TBAF in THF (0.3 mL, 1M in THF, 1.5 equiv) at 0 °C. The reaction was allowed to reach room temperature and was stirred for 3 hours. Then the mixture was extracted from sat.  $\text{NH}_4\text{Cl}_{\text{aq}}$  solution with EtOAc (10 mL x 3), washed with brine (15 mL), dried over anhydrous  $\text{Na}_2\text{SO}_4$ , and concentrated. Flash chromatography column (EtOAc) afforded desired compound **7** (104 mg) in 88% yield. Mixture of two isomers (1:1)  $^1\text{H}$  NMR ( $\text{CDCl}_3$ , 400 MHz, 25 °C)  $\delta$  = 6.81 (d,  $J$  = 16.5 Hz, 1H), 6.70 (s, 2H), 6.62 (s, 1H), 6.54 (s, 1H), 6.10 (d,  $J$  = 16.1 Hz, 1H), 5.82-5.64 (m, 2H), 5.55-5.44 (m, 2H), 5.44-5.34 (m, 2H), 5.18 (s x 2, 8H), 5.15-5.07 (m, 2H), 4.80 (s, 4H), 4.47 (d,  $J$  = 15.7 Hz, 1H), 3.97-3.89 (m, 2H), 3.71 (q,  $J$  = 6.8 Hz, 4H), 3.68 (q,  $J$  = 6.8 Hz, 4H), 3.60-3.35 (m, 10H), 3.12 (d,  $J$  = 15.7 Hz, 1H), 2.48-2.24 (m, 6H), 2.22-2.19 (m, 2H), 1.69-1.50 (m, 12H), 1.42 (d,  $J$  = 6 Hz, 6H), 1.22 (t,  $J$  = 6.9 Hz, 6H), 1.19 (t,  $J$  = 6.9 Hz, 6H), 2 OH signals are not visible;  $^{13}\text{C}$  NMR (100 MHz,  $\text{CDCl}_3$ , 25°C)  $\delta$  = 168.1, 168.0, 167.1, 166.9, 159.4, 159.2, 157.6, 155.8, 155.6, 154.7, 137.9, 137.5, 136.5, 135.9 (x 4), 129.6, 129.5, 127.6, 120.5 (x 2), 109.2, 108.5, 101.9, 101.8, 93.7 (x 2), 93.5, 93.3, 73.8, 73.6, 72.7, 72.4, 71.0, 70.9, 64.7 (x 2), 64.6 (x 2), 46.2, 46.1, 43.1 (x 2), 40.8, 40.3, 39.9 (x 2), 35.1 (x 2), 29.1, 26.6, 25.7, 25.6, 24.7 (x 2), 20.5 (x 2), 15.3 (x 2), 15.2 (x 2).

**Deprotection of the EOM groups, synthesis of compound 1<sub>A1B5CID1</sub> 1-4** To a solution of **7** (100 mg) were added 10 equiv of sulfonic acid polystyrene resin (sulfonic acid resin MP, 70-90 mesh, 3.0 mmol/g, Novabiochem, 01-64-0432) and the suspension was stirred for 4 hours at room temperature. The mixture was then filtered, and passed through a pad of silica gel. The four single isomers were separated on an HPLC (20-80%  $\text{CH}_3\text{CN}$  in Water gradient in 50 min, flow: 2 mL/min, Discovery<sup>R</sup> HS C18, 5 $\mu\text{m}$ , 5 cm x 10.0 mm). The two first fractions were assigned by nmr (vide supra) to be Z isomers of the oxime and the two last fractions E



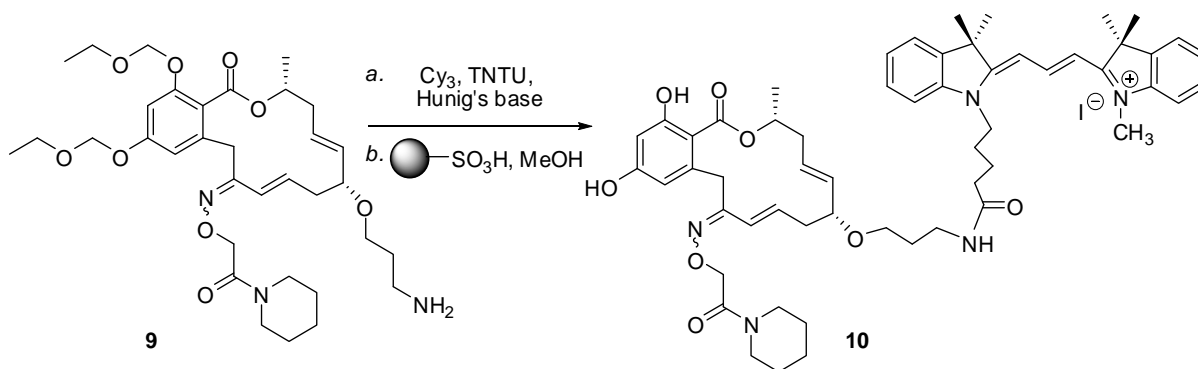

**Synthesis of Cy3 labeled macrocycle 10.** To a solution of amine **9** (11 mg, 0.017 mmol) in DMF (1 mL) was added TNTU (10 mg, 1.35 equiv), Hunig's base (20  $\mu$ L, 3.0 equiv), and fluorophore (15 mg, 1.5 equiv) sequentially at 0  $^{\circ}$ C under nitrogen atmosphere and the reaction was warmed up to 23  $^{\circ}$ C and kept stirring for 1 hour. The reaction was concentrated, the residue dissolved in MeOH (2 mL) and then treated with sulfonic acid resin (30 mg, 3.0 mmol/g) at 40  $^{\circ}$ C. After stirring for 2 hours, the reaction was filtered, rinsed with MeOH and  $\text{CH}_2\text{Cl}_2$ . The filtrate was concentrated and a purification by preparative TLC (silica gel,  $\text{CH}_2\text{Cl}_2/\text{MeOH}$ , 10/1) afforded the desired Cy3-labeled compound **10**. MS (ES)  $m/z$   $[\text{M}]^+$  calcd for  $\text{C}_{57}\text{H}_{72}\text{N}_5\text{O}_8$ : 954.54; found: 954.53.

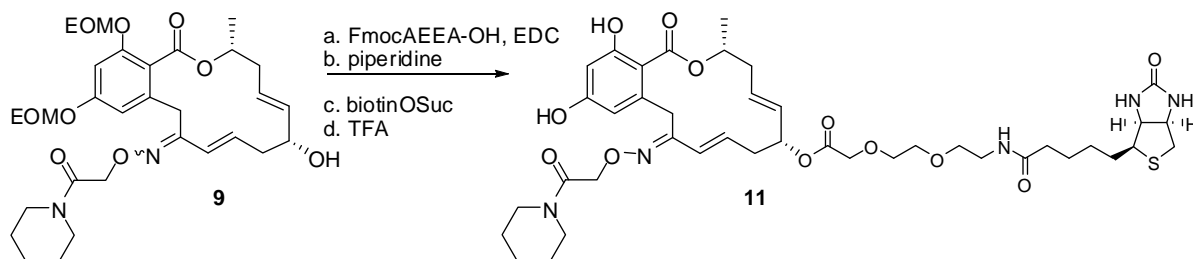

**Procedure for the synthesis of biotinylated pochoxime 11.** To a solution of **6** (100 mg, 0.17 mmol) in  $\text{CH}_2\text{Cl}_2$  (4 mL) at room temperature were added sequentially FmocAEEA-OH (130 mg 0.34 mmol, 2.0 equiv), EDC (64 mg, 0.34 mmol, 2.0 equiv) and DMAP (2 mg, 0.1 equiv). The mixture was stirred for 22 hours at room temperature, then was diluted with EtOAc and washed with sat.  $\text{NH}_4\text{Cl}$  solution extracted, washed with brine, dried over anhydrous  $\text{Na}_2\text{SO}_4$ , filtered and concentrated. Flash chromatography column (silica gel,  $\text{CH}_2\text{Cl}_2/\text{EtOAc}$  6/4) afforded the desired compound **12** (81 mg, 0.17 mmol) in 55% yield. This compound was directly dissolved in 20% piperidine in dimethyl formamide and the mixture was stirred for 10 min at room temperature. The solvent was then evaporated and the mixture was filtered through a short pad of silica using 10% methanol in  $\text{CH}_2\text{Cl}_2$  to isolate

the corresponding amine **13**. To a solution of this material in DMF was added biotinOSu (70 mg, 0.20 mmol, 1.2 equiv), and Et<sub>3</sub>N (110 μL, 0.8 mmol, 4.6 equiv) dropwise and the mixture was stirred at room temperature for 12 hours. Then, the reaction was evaporated and the crude was purified by flash chromatography (silica gel, 10 % methanol in CH<sub>2</sub>Cl<sub>2</sub>) to afford the biotinilated EOM protected macrocycle **14** (97 mg, 0.10 mmol) in a 60% yield. This compound was dissolved in a mixture of TFA/cresol 4/1 (400 μL/100 μL) Conversion of the deprotection reaction was followed by LC-MS. Once the reaction was completed (10 minutes) ethyl ether (10 mL) were added and desired compound **11** precipitated in a pure form (HPLC) as a white powder (80 mg). MS (ES) m/z [M]<sup>+</sup> calcd for C<sub>41</sub>H<sub>57</sub>N<sub>5</sub>O<sub>12</sub>SH: 844.98; found: 844.92.

**HSP90 affinity assay, Fluorescence Polarization Hsp90α Competition Assay.** The assays were performed as previously reported<sup>1</sup> according to slight modification of Chiosis et al's protocol<sup>3</sup>. Fluoresceine-GA was purchased from InvivoGen and dissolved in DMSO to form a 1 mM solution. HSP90α was purchased from Stressgen (SPP-776F). The assay buffer contained 20 mM HEPES (K), pH 7.3, 50 mM KCl, 5 mM MgCl<sub>2</sub>, 20 mM Na<sub>2</sub>MoO<sub>4</sub>, 0.01% Tergitol® solution Type NP-40, 70% in H<sub>2</sub>O (Sigma-Aldrich, NP40S). Before each use, 0.1 mg/mL bovine gamma globulin (BGG; Calbiochem, 345876) and 2 mM DTT (Fluka, 43817) were freshly added. Fluorescence polarizations measurements were performed on a Molecular Devices instrument, reading black 96-well plates (Corning, 3650) from the top of the wells. Measurements were made with excitation at 485 nm and emission at 538 nm with a cutoff of 530nm. The polarization values were calculated using the equation  $mP = 1000 \times [(I_S - I_{SB}) - (I_P - I_{PB})] / [(I_S - I_{SB}) + (I_P - I_{PB})]$ , where I<sub>S</sub> is the parallel emission intensity, I<sub>P</sub> is the perpendicular emission intensity and I<sub>SB</sub> and I<sub>PB</sub> are the values for the background. Stocks solutions of the compounds were made in DMSO at concentrations of 10 mM. The drugs were serially diluted over a threefold dilution in assay buffer starting from 30 μM, and 1 μM. GA-FITC and Hsp90 were added at 5 and 25 nM concentrations respectively. Total reaction mixture was of 100 μL. The plates were shaken at 4 °C for 5 h in the dark and then the FP values were recorded. A window of 100 mP was observed between wells containing protein and tracer and wells containing tracer only. The measured FP values (mP) were plotted

---

<sup>3</sup> J. Kim, S. Felts, L. Llauger, H. He, H. Huezo, N. Rosen, G. Chiosis, *J. Biomol. Screen.* **2004**, *9*, 375



against the competitor concentration. EC50 values were determined as the competitor concentration where 50 % of GA was displaced.

### **Client protein depletion assay**

The protein depletion assays were performed as previously described (W. Xu, E. Mimnaugh, M. F. Rosser, C. Nicchitta, M. Marcu, Y. Yarden, L. Neckers, *J. Biol. Chem.* **2001**, 276, 3702).

### **Pochoxime – HSP90 cocrystal structure**

The N-terminal domain of Hsp90 $\alpha$  was cocrystallized in the presence of a 2-fold molar excess of the inhibitors pochoxime A and B. Complete datasets were collected at the ESRF in Grenoble on beamline ID144.

*Data processing.* Diffraction images were processed with MOSFLM and SCALA (Table S1).

**Table S1: Data collection statistics**

| <b>Inhibitor</b>                           | <b>Pochoxime A</b>     | <b>Pochoxime B</b>     |
|--------------------------------------------|------------------------|------------------------|
| <b>Spacegroup</b>                          | I222                   | I222                   |
| <b>Unit cell parameters [Å]</b>            | 68.05, 90.69, 98.75    | 67.20, 89.62, 98.39    |
| <b>Resolution [Å]</b>                      | 19.30-1.75 (1.84-1.75) | 20.00-1.75 (1.84-1.75) |
| <b># Unique reflections</b>                | 31086 (4497)           | 30015 (4338)           |
| <b>Wilson B</b>                            | 24.8                   | 15.9                   |
| <b>I/<math>\sigma</math>(I) 14.5 (2.5)</b> | 12.0 (2.2)             | 14.5 (2.5)             |
| <b>Completeness [%]</b>                    | 99.8 (100.0)           | 99.3 (99.9)            |
| <b>Multiplicity</b>                        | 4.7 (4.8)              | 3.3 (3.3)              |
| <b>Rmeas</b>                               | 0.09 (0.60)            | 0.10 (0.61)            |

*Structure determination.* The structures were solved by molecular replacement methods using the structure of the Hsp90 N-terminal domain (PDB ID: 1YER) as a starting model. All water molecules in the vicinity of the nucleotide binding site were removed prior to molecular replacement calculations by our automatic pipeline. Rigid body refinement and

subsequent cycles of alternating manual re-building and maximum likelihood refinement with Refmac5 resulted in the current model (Table S2). The inhibitors could be unambiguously placed in the calculated FoFc difference electron densities. Water molecules were included where stereochemically plausible and difference electron densities of more than  $4.0 \sigma$  were observed.

**Table S2: Refinement statistics**

| <b>Inhibitor</b>           | <b>Pochoxime A</b>    | <b>Pochoxime B</b>    |
|----------------------------|-----------------------|-----------------------|
| <b>Resolution</b>          | 20.0-1.95 (2.00-1.95) | 20.0-1.75 (1.79-1.75) |
| <b>Rwork</b>               | 0.185 (0.251)         | 0.168 (0.244)         |
| <b>Rfree</b>               | 0.240 (0.405)         | 0.217 (0.346)         |
| <b>Completeness [%]</b>    | 97.2 (97.6)           | 99.1 (99.9)           |
| <b>r.m.s.d. bonds [Å]</b>  | 0.020                 | 0.018                 |
| <b>r.m.s.d. angles [°]</b> | 2.001                 | 1.594                 |

In both structures, single residues at the protein surface are disordered and did not allow an unambiguous placement of their sidechains (e.g. in the vicinity of Gln85, Gln123, Gly177). The only outlier in the Ramachandran plot is Ala166, which displays well defined electron density in both structures. The electron density for peptide segment from Ile104 through Ala111 is also unambiguous.

Table 1 with structures of fragments A-C

| entry | compound                                                                                             |                                                                                                      | affinity ( $\mu\text{M}$ )                                                                           | $r^2$                                                                                                | PD ( $\mu\text{M}$ ) |            |            |            |
|-------|------------------------------------------------------------------------------------------------------|------------------------------------------------------------------------------------------------------|------------------------------------------------------------------------------------------------------|------------------------------------------------------------------------------------------------------|----------------------|------------|------------|------------|
| 1     | 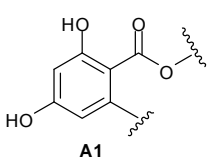 <p><b>A1</b></p>  |  <p><b>B1</b></p>   |  <p><b>C1</b></p>   | D1                                                                                                   | 0.034                | 0.996      | $\leq 5.0$ |            |
| 2     |                                                                                                      |                                                                                                      | D18                                                                                                  | 0.540                                                                                                | 0.994                |            |            |            |
| 3     |                                                                                                      |                                                                                                      |  <p><b>C2</b></p>   |  <p><b>C4</b></p>   | D1                   | 0.588      | 0.991      | $> 10$     |
| 4     |                                                                                                      |                                                                                                      |                                                                                                      |                                                                                                      | D2                   | 0.886      | 0.997      |            |
| 5     |                                                                                                      |                                                                                                      |                                                                                                      |                                                                                                      | D3                   | 0.060      | 0.991      | $\leq 0.1$ |
| 6     |                                                                                                      |                                                                                                      |                                                                                                      |                                                                                                      | D4                   | 0.070      | 0.983      | $\leq 0.5$ |
| 7     |                                                                                                      |                                                                                                      |                                                                                                      |                                                                                                      | D5                   | 0.243      | 0.994      | $< 1.0$    |
| 8     |                                                                                                      |                                                                                                      |                                                                                                      |                                                                                                      | D6                   | 0.238      | 0.990      | $< 5.0$    |
| 9     |                                                                                                      |                                                                                                      |                                                                                                      |                                                                                                      | D7                   | 2.240      | 0.990      | $> 10$     |
| 10    |                                                                                                      |                                                                                                      |                                                                                                      |                                                                                                      | D8                   | 5.757      | 0.995      | $> 10$     |
| 11    |                                                                                                      |                                                                                                      |                                                                                                      |                                                                                                      | D9                   | 0.022*     | 0.988      | $\leq 0.5$ |
| 12    |                                                                                                      |                                                                                                      |                                                                                                      |                                                                                                      | D10                  | 0.124      | 0.995      | $\leq 0.5$ |
| 13    |                                                                                                      |                                                                                                      |                                                                                                      |                                                                                                      | D11                  | 0.070      | 0.998      | $\leq 0.5$ |
| 14    |                                                                                                      |                                                                                                      |                                                                                                      |                                                                                                      | D12                  | 0.640      | 0.997      | $\leq 5.0$ |
| 15    |                                                                                                      |                                                                                                      |                                                                                                      |                                                                                                      | D13                  | $> 10$     | 0.991      |            |
| 16    |                                                                                                      |                                                                                                      |                                                                                                      |                                                                                                      | D14                  | 0.337      | 0.995      | $\leq 5.0$ |
| 17    |                                                                                                      |                                                                                                      |                                                                                                      |                                                                                                      | D15                  | 0.128      | 0.997      | $\leq 1.0$ |
| 18    |                                                                                                      |                                                                                                      |                                                                                                      |                                                                                                      | D16                  | 0.119      | 0.982      | $\leq 1.0$ |
| 19    |                                                                                                      |                                                                                                      |                                                                                                      |                                                                                                      | D17                  | 0.219      | 0.998      | $\leq 0.5$ |
| 20    |                                                                                                      |                                                                                                      |                                                                                                      |                                                                                                      | D18                  | 0.196      | 0.991      | $\leq 1.0$ |
| 21    |                                                                                                      |                                                                                                      |                                                                                                      |                                                                                                      | D19                  | 0.094      | 0.982      | $\leq 5.0$ |
| 22    |                                                                                                      |                                                                                                      |                                                                                                      |                                                                                                      | D20                  | 0.162      | 0.993      | $\leq 1.0$ |
| 23    |                                                                                                      |                                                                                                      |                                                                                                      |                                                                                                      | D21                  | 2.992      | 0.993      | $> 10$     |
| 24    |                                                                                                      |                                                                                                      |                                                                                                      |                                                                                                      | D22                  | 0.057      | 0.984      | $\leq 1.0$ |
| 25    |                                                                                                      |                                                                                                      |                                                                                                      |                                                                                                      | D23                  | 0.140      | 0.991      |            |
| 26    |                                                                                                      |                                                                                                      |                                                                                                      |                                                                                                      | D24                  | 0.155      | 0.987      | $\leq 5.0$ |
| 27    | D25                                                                                                  | 0.116                                                                                                |                                                                                                      |                                                                                                      | 0.980                | $\leq 1.0$ |            |            |
| 28    | D26                                                                                                  | 0.372                                                                                                |                                                                                                      |                                                                                                      | 0.994                | $\leq 10$  |            |            |
| 29    |  <p><b>B2</b></p> |  <p><b>C2</b></p> | D1                                                                                                   | 1.936                                                                                                | 0.997                | $> 10$     |            |            |
| 30    |                                                                                                      |                                                                                                      |                                                                                                      |  <p><b>C6</b></p> | 3.027                | 0.989      | $> 10$     |            |
| 31    |  <p><b>B3</b></p> |  <p><b>C1</b></p> | D18                                                                                                  | 0.200                                                                                                | 0.989                | $\leq 1.0$ |            |            |
| 32    |                                                                                                      |                                                                                                      |  <p><b>C2</b></p> | D1                                                                                                   | 0.196                | 0.994      | $\leq 1.0$ |            |
| 33    |                                                                                                      |                                                                                                      |                                                                                                      | D18                                                                                                  | 4.663                | 0.993      | $> 10$     |            |
| 34    |  <p><b>C4</b></p> | D1                                                                                                   | 0.046                                                                                                | 0.976                                                                                                | $\leq 0.5$           |            |            |            |
| 35    |                                                                                                      |                                                                                                      |  <p><b>C1</b></p> | 0.032                                                                                                | 0.910                |            |            |            |
| 36    |  <p><b>B4</b></p> |  <p><b>C2</b></p> | D1                                                                                                   | 0.811                                                                                                | 0.988                |            |            |            |

|    |  |  |  |     |        |       |      |
|----|--|--|--|-----|--------|-------|------|
| 37 |  |  |  |     | 0.021* | 0.988 | ≤0.5 |
| 38 |  |  |  |     | 0.587  | 0.987 | ≤5.0 |
| 39 |  |  |  | D1  | 0.020* | 0.965 |      |
| 40 |  |  |  |     | 0.039  | 0.996 |      |
| 41 |  |  |  |     | 0.096  | 0.994 | ≤5.0 |
| 42 |  |  |  |     | 0.198  | 0.980 | ≤1.0 |
| 43 |  |  |  | D1  | 0.182  | 0.984 | ≤5.0 |
| 44 |  |  |  |     | 0.079  | 0.931 |      |
| 45 |  |  |  |     | 0.432  | 0.985 | ≤1.0 |
| 46 |  |  |  | D1  | 0.543  | 0.981 | ≤5.0 |
| 47 |  |  |  |     | 0.510  | 0.986 | ≤10  |
| 48 |  |  |  | D18 | 0.900  | 0.976 | >10  |
| 49 |  |  |  |     | 0.154  | 0.995 | ≤1.0 |
| 50 |  |  |  |     | 1.751  | 0.998 | ≤10  |
| 51 |  |  |  | D1  | 0.170  | 0.976 | ≤5.0 |

|    |                                                                                   |                                                                                   |        |       |     |
|----|-----------------------------------------------------------------------------------|-----------------------------------------------------------------------------------|--------|-------|-----|
| 52 |                                                                                   | 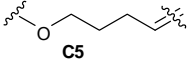 | 1.722  | 0.996 | >10 |
| 53 |                                                                                   |  | 0.599  | 0.995 | >10 |
| 54 |  |  | 0.010* | 0.980 |     |
| 55 |                                                                                   |  | 0.018* | 0.980 |     |
| 56 | radicol                                                                           |                                                                                   | 0.156  | 0.997 |     |
| 57 | 17-AAG                                                                            |                                                                                   | 0.033  | 0.978 |     |

\* Based on the fact that the assay is performed using 20 nM of HSP90,

IC<sub>50</sub> below 20 nM can not be reliably measured
